# Supplementary material for: Ephrin-B1 regulates the adult diastolic function through a late postnatal maturation of cardiomyocyte surface crests
Source: eLife. 2023 Jan 17;12:e80904. doi: 10.7554/eLife.80904 (PMC9844986; doi:10.7554/eLife.80904)
Supplement: Figure 1—figure supplement 5—source data 1. [file elife-80904-fig1-figsupp5-data1.xlsx]

## Sheet: Figure 1-figure supplement 5
Supplementary Figure 5								Figure 1-figure supplement 5
Crest height /sarcomere length								Mitochondria area (µm2)								Mitochondria number
P20 WT			P60 WT					P20 WT			P60 WT					P20 WT			P60 WT
Mean	SD	N	Mean	SD	N			Mean	SD	N	Mean	SD	N			Mean	SD	N	Mean	SD	N
0.5211	0.3937	78	0.6053	0.2276	87			0.3087	0.1764	45	0.345	0.2697	103			0.5769	0.5227	78	1.184	0.5398	87
0.5318	0.2069	59	0.546	0.2182	32			0.1439	0.1146	38	0.3853	0.3645	43			0.7755	0.7975	49	1.344	0.7007	32
0.4584	0.334	60	0.683	0.2784	72			0.2964	0.1537	42	0.473	0.2567	69			0.75	0.58	56	0.9718	0.5338	71
0.3876	0.1867	64	0.5459	0.155	54			0.2357	0.2674	50	0.3927	0.219	64			0.7813	0.8992	64	1.185	0.552	54
0.3102	0.1787	34	0.6898	0.3165	37			0.227	0.1525	8	0.3906	0.2549	45			0.2353	0.4306	34	1.216	0.6296	37
Statistics								Statistics								Statistics
Table Analyzed	Crest / sarcomere Mice							Table Analyzed	Mitochondria area Mice							Table Analyzed	Mitochondria number Mice
Column B	P60 WT							Column B	P60 WT							Column B	P60 WT
vs.	vs,							vs.	vs,							vs.	vs,
Column A	P20 WT							Column A	P20 WT							Column A	P20 WT
Unpaired t test								Unpaired t test								Unpaired t test
P value	0.011							P value	0.0026							P value	0.0017
P value summary	*							P value summary	**							P value summary	**
Significantly different (P < 0.05)?	Yes							Significantly different (P < 0.05)?	Yes							Significantly different (P < 0.05)?	Yes
One- or two-tailed P value?	Two-tailed							One- or two-tailed P value?	Two-tailed							One- or two-tailed P value?	Two-tailed
t, df	t=3,290, df=8							t, df	t=4,301, df=8							t, df	t=4,633, df=8
How big is the difference?								How big is the difference?								How big is the difference?
Mean of column A	0.4418							Mean of column A	0.2423							Mean of column A	0.6238
Mean of column B	0.614							Mean of column B	0.3973							Mean of column B	1.18
Difference between means (B - A) ± SEM	0,1722 ± 0,05233							Difference between means (B - A) ± SEM	0,1550 ± 0,03604							Difference between means (B - A) ± SEM	0,5564 ± 0,1201
95% confidence interval	0,05151 to 0,2928							95% confidence interval	0,07188 to 0,2381							95% confidence interval	0,2794 to 0,8333
R squared (eta squared)	0.5751							R squared (eta squared)	0.6981							R squared (eta squared)	0.7285
F test to compare variances								F test to compare variances								F test to compare variances
F, DFn, Dfd	1,760, 4, 4							F, DFn, Dfd	1,994, 4, 4							F, DFn, Dfd	3,030, 4, 4
P value	0.5975							P value	0.5204							P value	0.3083
P value summary	ns							P value summary	ns							P value summary	ns
Significantly different (P < 0.05)?	No							Significantly different (P < 0.05)?	No							Significantly different (P < 0.05)?	No
Data analyzed								Data analyzed								Data analyzed
Sample size, column A	5							Sample size, column A	5							Sample size, column A	5
Sample size, column B	5							Sample size, column B	5							Sample size, column B	5
