# Supplementary material for: Ephrin-B1 regulates the adult diastolic function through a late postnatal maturation of cardiomyocyte surface crests
Source: eLife. 2023 Jan 17;12:e80904. doi: 10.7554/eLife.80904 (PMC9844986; doi:10.7554/eLife.80904)
Supplement: Figure 1—figure supplement 8—source data 1. [file elife-80904-fig1-figsupp8-data1.xlsx]

## Sheet: Figure 1-figure supplement 8C
Figure 1-figure supplement 8C
TT Power				TT Frequency (µm-1)
P20	P60			P20	P60
0.318	6.041			0.554	0.58
0.22	4.901			0.554	0.585
0.105				0.593
0.64				0.568
