# Supplementary material for: Ephrin-B1 regulates the adult diastolic function through a late postnatal maturation of cardiomyocyte surface crests
Source: eLife. 2023 Jan 17;12:e80904. doi: 10.7554/eLife.80904 (PMC9844986; doi:10.7554/eLife.80904)
Supplement: Figure 1—source data 1. [file elife-80904-fig1-data1.xlsx]

## Sheet: Figure 1B
Figure 1B
Crest height / sarcomere length								Mitochondria number								Mitochondria area (µm2)
P20			P60					P20			P60					P20			P60
Mean	SD	N	Mean	SD	N			Mean	SD	N	Mean	SD	N			Mean	SD	N	Mean	SD	N
0.6147	0.2676	110	0.9134	0.377	74			0.7304	0.7983	115	1.73	1.076	74			0.2084	0.155	84	0.2222	0.1464	128
0.4731	0.2688	67	0.7059	0.2149	72			0.8308	0.8398	65	1.583	1.004	72			0.176	0.1442	54	0.3012	0.2028	113
0.459	0.2571	147	0.6155	0.2242	27			0.669	0.8338	145	1.407	0.6939	27			0.1477	0.1132	97	0.2612	0.1365	37
0.3725	0.1696	34	0.6724	0.2078	25			0.6176	0.9539	34	1.086	0.5071	35			0.1602	0.1085	21	0.4248	0.3085	38
0.4247	0.2192	47	0.8999	0.3287	96			0.6383	0.6733	47	0.6458	0.7395	96			0.1138	0.08648	30	0.2806	0.1968	62
0.3878	0.1478	51	1.041	0.2519	45			0.4706	0.6435	51	1.333	0.7385	45			0.09775	0.07809	24	0.5703	0.4059	60
Statistics								Statistics								Statistics
Table Analyzed	Crest height / Sarcomere length P60 vs P20							Table Analyzed	Mitochondria number P60 vs P20							Table Analyzed	Mitochondria area P60 vs P20
Column B	P60							Column B	P60							Column B	P60
vs.	vs,							vs.	vs,							vs.	vs,
Column A	P20							Column A	P20							Column A	P20
Unpaired t test								Unpaired t test								Unpaired t test
P value	0.001							P value	0.0032							P value	0.0062
P value summary	**							P value summary	**							P value summary	**
Significantly different (P < 0.05)?	Yes							Significantly different (P < 0.05)?	Yes							Significantly different (P < 0.05)?	Yes
One- or two-tailed P value?	Two-tailed							One- or two-tailed P value?	Two-tailed							One- or two-tailed P value?	Two-tailed
t, df	t=4,582, df=10							t, df	t=3,851, df=10							t, df	t=3,452, df=10
How big is the difference?								How big is the difference?								How big is the difference?
Mean of column A	0.4553							Mean of column A	0.6595							Mean of column A	0.1506
Mean of column B	0.808							Mean of column B	1.297							Mean of column B	0.3434
Difference between means (B - A) ± SEM	0,3527 ± 0,07698							Difference between means (B - A) ± SEM	0,6380 ± 0,1657							Difference between means (B - A) ± SEM	0,1927 ± 0,05583
95% confidence interval	0,1812 to 0,5242							95% confidence interval	0,2688 to 1,007							95% confidence interval	0,06834 to 0,3171
R squared (eta squared)	0.6773							R squared (eta squared)	0.5972							R squared (eta squared)	0.5437
F test to compare variances								F test to compare variances								F test to compare variances
F, DFn, Dfd	3,668, 5, 5							F, DFn, Dfd	10,38, 5, 5							F, DFn, Dfd	10,36, 5, 5
P value	0.1801							P value	0.0226							P value	0.0227
P value summary	ns							P value summary	*							P value summary	*
Significantly different (P < 0.05)?	No							Significantly different (P < 0.05)?	Yes							Significantly different (P < 0.05)?	Yes
Data analyzed								Data analyzed								Data analyzed
Sample size, column A	6							Sample size, column A	6							Sample size, column A	6
Sample size, column B	6							Sample size, column B	6							Sample size, column B	6
