# Supplementary material for: Ephrin-B1 regulates the adult diastolic function through a late postnatal maturation of cardiomyocyte surface crests
Source: eLife. 2023 Jan 17;12:e80904. doi: 10.7554/eLife.80904 (PMC9844986; doi:10.7554/eLife.80904)
Supplement: Figure 1—source data 2. [file elife-80904-fig1-data2.xlsx]

## Sheet: Figure 1C
Figure 1C
Claudin-5 expression (A.U.)
P0	P3	P5	P10	P20	P60
0.461568	0.601797	0.84626	1.34339	1.45254	1.02233
0.112229	0.655309	0.551306	0.778176	0.838054	0.761684
0.849155	1.07899	1.50103	1.65947	1.89683	1.48041
0.37092	0.386678	1.24352	1.83584	3.13627	2.29865
0.410381		1.12746	3.80365	1.06683	1.96479
Statistics
Number of families	1
Number of comparisons per family	15
Alpha	0.05
Tukey's multiple comparisons test	Mean Diff,	95,00% CI of diff,	Below threshold?	Summary	Adjusted P Value
P0 vs. P3	-0.2398	-1,696 to 1,216	No	ns	0.9952	A-B
P0 vs. P5	-0.6131	-1,986 to 0,7598	No	ns	0.7348	A-C
P0 vs. P10	-1.443	-2,816 to -0,07044	Yes	*	0.0355	A-D
P0 vs. P20	-1.237	-2,610 to 0,1356	No	ns	0.094	A-E
P0 vs. P60	-1.065	-2,438 to 0,3081	No	ns	0.1952	A-F
P3 vs. P5	-0.3732	-1,829 to 1,083	No	ns	0.9655	B-C
P3 vs. P10	-1.203	-2,660 to 0,2527	No	ns	0.1469	B-D
P3 vs. P20	-0.9974	-2,454 to 0,4587	No	ns	0.3096	B-E
P3 vs. P60	-0.8249	-2,281 to 0,6312	No	ns	0.5102	B-F
P5 vs. P10	-0.8302	-2,203 to 0,5426	No	ns	0.4404	C-D
P5 vs. P20	-0.6242	-1,997 to 0,7486	No	ns	0.7204	C-E
P5 vs. P60	-0.4517	-1,824 to 0,9212	No	ns	0.9061	C-F
P10 vs. P20	0.206	-1,167 to 1,579	No	ns	0.9969	D-E
P10 vs. P60	0.3785	-0,9943 to 1,751	No	ns	0.9532	D-F
P20 vs. P60	0.1725	-1,200 to 1,545	No	ns	0.9987	E-F
Test details	Mean 1	Mean 2	Mean Diff,	SE of diff,	n1	n2	q	DF
P0 vs. P3	0.4409	0.6807	-0.2398	0.4693	5	4	0.7228	23
P0 vs. P5	0.4409	1.054	-0.6131	0.4424	5	5	1.96	23
P0 vs. P10	0.4409	1.884	-1.443	0.4424	5	5	4.613	23
P0 vs. P20	0.4409	1.678	-1.237	0.4424	5	5	3.955	23
P0 vs. P60	0.4409	1.506	-1.065	0.4424	5	5	3.403	23
P3 vs. P5	0.6807	1.054	-0.3732	0.4693	4	5	1.125	23
P3 vs. P10	0.6807	1.884	-1.203	0.4693	4	5	3.627	23
P3 vs. P20	0.6807	1.678	-0.9974	0.4693	4	5	3.006	23
P3 vs. P60	0.6807	1.506	-0.8249	0.4693	4	5	2.486	23
P5 vs. P10	1.054	1.884	-0.8302	0.4424	5	5	2.654	23
P5 vs. P20	1.054	1.678	-0.6242	0.4424	5	5	1.995	23
P5 vs. P60	1.054	1.506	-0.4517	0.4424	5	5	1.444	23
P10 vs. P20	1.884	1.678	0.206	0.4424	5	5	0.6585	23
P10 vs. P60	1.884	1.506	0.3785	0.4424	5	5	1.21	23
P20 vs. P60	1.678	1.506	0.1725	0.4424	5	5	0.5515	23
