# Supplementary material for: Ephrin-B1 regulates the adult diastolic function through a late postnatal maturation of cardiomyocyte surface crests
Source: eLife. 2023 Jan 17;12:e80904. doi: 10.7554/eLife.80904 (PMC9844986; doi:10.7554/eLife.80904)
Supplement: Figure 3—source data 1. [file elife-80904-fig3-data1.xlsx]

## Sheet: Feuil1
Figure 3A
Heart rate (bpm)				LVEF (%)				IVRT (ms)				E/A				e' (cm/s)				e'/a'				E/e'
P20	P60			P20	P60			P20	P60			P20	P60			P20	P60			P20	P60			P20	P60
356.739	372.116			63.5501	65.685			18.765	15.7533			1.13128	1.28677			3.8443	6.7657			0.863813	1.27669			10.6714	18.8658
370.519	392.413			66.3546	70.6485			22.048	13.205			1.24084	1.3456			4.1895	7.06588			0.788732	1.33333			9.31981	16.6797
337.23	436.015			74.1826	64.6352			27.04	12.896			1.21463	1.40139			5.21118	5.24242			0.924583	1.12888			16.6987	12.235
373.727	389.58			66.7454	68.1377			19.136	10.564			1.2012	1.43888			4.67116	5.73528			0.83432	1.39959			17.6744	13.2623
352.371	378.644			66.3874	62.0748			20.1067	9.73			1.24105	1.30914			4.32761	6.31957			0.768224	1.19961			18.0278	14.2074
387.134	368.936			74.788	64.301			18.46	12.48			1.09424	1.36371			4.88033	5.12079			0.852802	1.17949			15.8133	11.3171
384.034	453.419			66.632	67.023			16.224	11.0933			1.0906	1.2714			4.66511	7.4808			0.901763	1.5869			10.7584	13.3423
351.892	453.419			65.9498	67.1077			19.76	11.12							4.37602	8.55526				1.257				14.21
												Statistics
Statistics				Statistics				Statistics				Table Analyzed	E/A			Statistics				Statistics				Statistics
Table Analyzed	Heart rate echo			Table Analyzed	LVEF (%)			Table Analyzed	IVRT, ms							Table Analyzed	e'			Table Analyzed	e'/a'			Table Analyzed	E/e'
												Column B	P60
Column B	P60			Column B	P60			Column B	P60			vs.	vs,			Column B	P60			Column B	P60			Column B	P60
vs.	vs,			vs.	vs,			vs.	vs,			Column A	P20			vs.	vs,			vs.	vs,			vs.	vs,
Column A	P20			Column A	P20			Column A	P20							Column A	P20			Column A	P20			Column A	P20
												Unpaired t test
Unpaired t test				Unpaired t test				Unpaired t test				P value	0.0003			Unpaired t test				Unpaired t test				Unpaired t test
P value	0.0112			P value	0.2944			P value	<0,0001			P value summary	***			P value	0.0004			P value	<0,0001			P value	0.9381
P value summary	*			P value summary	ns			P value summary	****			Significantly different (P < 0.05)?	Yes			P value summary	***			P value summary	****			P value summary	ns
Significantly different (P < 0.05)?	Yes			Significantly different (P < 0.05)?	No			Significantly different (P < 0.05)?	Yes			One- or two-tailed P value?	Two-tailed			Significantly different (P < 0.05)?	Yes			Significantly different (P < 0.05)?	Yes			Significantly different (P < 0.05)?	No
One- or two-tailed P value?	Two-tailed			One- or two-tailed P value?	Two-tailed			One- or two-tailed P value?	Two-tailed			t, df	t=5,035, df=12			One- or two-tailed P value?	Two-tailed			One- or two-tailed P value?	Two-tailed			One- or two-tailed P value?	Two-tailed
t, df	t=2,919, df=14			t, df	t=1,089, df=14			t, df	t=6,122, df=14							t, df	t=4,558, df=14			t, df	t=7,593, df=13			t, df	t=0,07919, df=13
												How big is the difference?
How big is the difference?				How big is the difference?				How big is the difference?				Mean of column A	1.173			How big is the difference?				How big is the difference?				How big is the difference?
Mean of column A	364.2			Mean of column A	68.07			Mean of column A	20.19			Mean of column B	1.345			Mean of column A	4.521			Mean of column A	0.8477			Mean of column A	14.14
Mean of column B	405.6			Mean of column B	66.2			Mean of column B	12.11			Difference between means (B - A) ± SEM	0,1719 ± 0,03413			Mean of column B	6.536			Mean of column B	1.295			Mean of column B	14.26
Difference between means (B - A) ± SEM	41,36 ± 14,17			Difference between means (B - A) ± SEM	-1,872 ± 1,719			Difference between means (B - A) ± SEM	-8,087 ± 1,321			95% confidence interval	0,09750 to 0,2462			Difference between means (B - A) ± SEM	2,015 ± 0,4420			Difference between means (B - A) ± SEM	0,4474 ± 0,05893			Difference between means (B - A) ± SEM	0,1273 ± 1,607
95% confidence interval	10,97 to 71,76			95% confidence interval	-5,558 to 1,814			95% confidence interval	-10,92 to -5,254			R squared (eta squared)	0.6788			95% confidence interval	1,067 to 2,963			95% confidence interval	0,3201 to 0,5747			95% confidence interval	-3,344 to 3,599
R squared (eta squared)	0.3783			R squared (eta squared)	0.07814			R squared (eta squared)	0.728							R squared (eta squared)	0.5975			R squared (eta squared)	0.816			R squared (eta squared)	0.0004822
												F test to compare variances
F test to compare variances				F test to compare variances				F test to compare variances				F, DFn, Dfd	1,181, 6, 6			F test to compare variances				F test to compare variances				F test to compare variances
F, DFn, Dfd	4,293, 7, 7			F, DFn, Dfd	2,419, 7, 7			F, DFn, Dfd	2,863, 7, 7			P value	0.8453			F, DFn, Dfd	7,582, 7, 7			F, DFn, Dfd	6,709, 7, 6			F, DFn, Dfd	2,342, 6, 7
P value	0.0736			P value	0.2667			P value	0.1885			P value summary	ns			P value	0.0159			P value	0.0337			P value	0.2902
P value summary	ns			P value summary	ns			P value summary	ns			Significantly different (P < 0.05)?	No			P value summary	*			P value summary	*			P value summary	ns
Significantly different (P < 0.05)?	No			Significantly different (P < 0.05)?	No			Significantly different (P < 0.05)?	No							Significantly different (P < 0.05)?	Yes			Significantly different (P < 0.05)?	Yes			Significantly different (P < 0.05)?	No
												Data analyzed
Data analyzed				Data analyzed				Data analyzed				Sample size, column A	7			Data analyzed				Data analyzed				Data analyzed
Sample size, column A	8			Sample size, column A	8			Sample size, column A	8			Sample size, column B	7			Sample size, column A	8			Sample size, column A	7			Sample size, column A	7
Sample size, column B	8			Sample size, column B	8			Sample size, column B	8							Sample size, column B	8			Sample size, column B	8			Sample size, column B	8
