# Supplementary material for: Ephrin-B1 regulates the adult diastolic function through a late postnatal maturation of cardiomyocyte surface crests
Source: eLife. 2023 Jan 17;12:e80904. doi: 10.7554/eLife.80904 (PMC9844986; doi:10.7554/eLife.80904)
Supplement: Figure 3—source data 2. [file elife-80904-fig3-data2.xlsx]

## Sheet: Feuil1
Figure 3B
Heart rate (bpm)				SBP (mmHg)				DBP (mmHg)				EDP (mmHg)				Tau (ms)				Min dP/dt (mmHg/s)				Max dP/dt (mmHg/s)
P20	P60			P20	P60			P20	P60			P20	P60			P20	P60			P20	P60			P20	P60
326.05	342			76.49	102			49.59	77			6.15	8.28			11.1	10.4363			-4736.94	-8020.09			4768.87	6641.5
324.35	317			80.74	98.83			59.46	73.86			7.46	8.93			11.1	9.9248			-3916.37	-8376.1			3959.31	9420.15
305.29	367.85			67.32	134.37			39.14	98.23			4.35	9.01			12.9	9.9899			-4581.81	-9671.5			4440.57	9795.62
310.31	282.48			72.54	108.29			45.89	75.98			8.81	10.02			12.6	10.5548			-3699.46	-8724.54			4062.99	8600.43
283.66	313.86			68.53	110.55			38.55	83.63			5.71	6.35			11.3	11.6554			-3842.81	-9565.41			3817.88	8199.37
325.35	348.43			62.95	125.52			39.79	97.29			4.16	8.87				10.1066			-3996.11	-8694.59			4164.56	6772.51
Statistics				Statistics				Statistics				Statistics				Statistics				Statistics				Statistics
Table Analyzed	Heart rate (bpm)			Table Analyzed	SBP (mmHg)			Table Analyzed	DBP (mmHg)			Table Analyzed	EDP, mmHg			Table Analyzed	Tau (ms)			Table Analyzed	Min dP/dt (mmHg/s)			Table Analyzed	Max dP/dt (mmHg/s)
Column B	P60			Column B	P60			Column B	P60			Column B	P60			Column B	P60			Column B	P60			Column B	P60
vs.	vs,			vs.	vs,			vs.	vs,			vs.	vs,			vs.	vs,			vs.	vs,			vs.	vs,
Column A	P20			Column A	P20			Column A	P20			Column A	P20			Column A	P20			Column A	P20			Column A	P20
Unpaired t test				Unpaired t test				Unpaired t test				Unpaired t test				Unpaired t test				Unpaired t test				Unpaired t test
P value	0.2803			P value	<0,0001			P value	<0,0001			P value	0.0195			P value	0.016			P value	<0,0001			P value	<0,0001
P value summary	ns			P value summary	****			P value summary	****			P value summary	*			P value summary	*			P value summary	****			P value summary	****
Significantly different (P < 0.05)?	No			Significantly different (P < 0.05)?	Yes			Significantly different (P < 0.05)?	Yes			Significantly different (P < 0.05)?	Yes			Significantly different (P < 0.05)?	Yes			Significantly different (P < 0.05)?	Yes			Significantly different (P < 0.05)?	Yes
One- or two-tailed P value?	Two-tailed			One- or two-tailed P value?	Two-tailed			One- or two-tailed P value?	Two-tailed			One- or two-tailed P value?	Two-tailed			One- or two-tailed P value?	Two-tailed			One- or two-tailed P value?	Two-tailed			One- or two-tailed P value?	Two-tailed
t, df	t=1,141, df=10			t, df	t=6,688, df=10			t, df	t=7,000, df=10			t, df	t=2,779, df=10			t, df	t=2,959, df=9			t, df	t=14,80, df=10			t, df	t=7,265, df=10
How big is the difference?				How big is the difference?				How big is the difference?				How big is the difference?				How big is the difference?				How big is the difference?				How big is the difference?
Mean of column A	312.5			Mean of column A	71.43			Mean of column A	45.4			Mean of column A	6.107			Mean of column A	11.8			Mean of column A	-4129			Mean of column A	4202
Mean of column B	328.6			Mean of column B	113.3			Mean of column B	84.33			Mean of column B	8.577			Mean of column B	10.44			Mean of column B	-8842			Mean of column B	8238
Difference between means (B - A) ± SEM	16,10 ± 14,11			Difference between means (B - A) ± SEM	41,83 ± 6,255			Difference between means (B - A) ± SEM	38,93 ± 5,561			Difference between means (B - A) ± SEM	2,470 ± 0,8889			Difference between means (B - A) ± SEM	-1,355 ± 0,4580			Difference between means (B - A) ± SEM	-4713 ± 318,5			Difference between means (B - A) ± SEM	4036 ± 555,5
95% confidence interval	-15,33 to 47,53			95% confidence interval	27,89 to 55,77			95% confidence interval	26,54 to 51,32			95% confidence interval	0,4895 to 4,450			95% confidence interval	-2,392 to -0,3192			95% confidence interval	-5423 to -4003			95% confidence interval	2798 to 5274
R squared (eta squared)	0.1153			R squared (eta squared)	0.8173			R squared (eta squared)	0.8305			R squared (eta squared)	0.4357			R squared (eta squared)	0.4931			R squared (eta squared)	0.9563			R squared (eta squared)	0.8407
F test to compare variances				F test to compare variances				F test to compare variances				F test to compare variances				F test to compare variances				F test to compare variances				F test to compare variances
F, DFn, Dfd	3,333, 5, 5			F, DFn, Dfd	4,570, 5, 5			F, DFn, Dfd	1,786, 5, 5			F, DFn, Dfd	2,149, 5, 5			F, DFn, Dfd	1,860, 4, 5			F, DFn, Dfd	2,367, 5, 5			F, DFn, Dfd	14,29, 5, 5
P value	0.2124			P value	0.1209			P value	0.54			P value	0.4211			P value	0.511			P value	0.3661			P value	0.0111
P value summary	ns			P value summary	ns			P value summary	ns			P value summary	ns			P value summary	ns			P value summary	ns			P value summary	*
Significantly different (P < 0.05)?	No			Significantly different (P < 0.05)?	No			Significantly different (P < 0.05)?	No			Significantly different (P < 0.05)?	No			Significantly different (P < 0.05)?	No			Significantly different (P < 0.05)?	No			Significantly different (P < 0.05)?	Yes
Data analyzed				Data analyzed				Data analyzed				Data analyzed				Data analyzed				Data analyzed				Data analyzed
Sample size, column A	6			Sample size, column A	6			Sample size, column A	6			Sample size, column A	6			Sample size, column A	5			Sample size, column A	6			Sample size, column A	6
Sample size, column B	6			Sample size, column B	6			Sample size, column B	6			Sample size, column B	6			Sample size, column B	6			Sample size, column B	6			Sample size, column B	6
