# Supplementary material for: Ephrin-B1 regulates the adult diastolic function through a late postnatal maturation of cardiomyocyte surface crests
Source: eLife. 2023 Jan 17;12:e80904. doi: 10.7554/eLife.80904 (PMC9844986; doi:10.7554/eLife.80904)
Supplement: Figure 4—figure supplement 1—source data 1. [file elife-80904-fig4-figsupp1-data1.xlsx]

## Sheet: Feuil1
Figure 4-figure supplement 1
CM-CSA (µm2)
P20	P30	P45	P60
80.9	133.3	260.8	235
75.4	145.3	188.6	175.6
80.54	120.8	227	226.3
110.6		190.8	277.5
Statistics
Number of families	1
Number of comparisons per family	6
Alpha	0.05
Tukey's multiple comparisons test	Mean Diff,	95,00% CI of diff,	Below threshold?	Summary	Adjusted P Value
P20 vs. P30	-46.27	-115,0 to 22,43	No	ns	0.2362	A-B
P20 vs. P45	-129.9	-193,6 to -66,33	Yes	***	0.0004	A-C
P20 vs. P60	-141.7	-205,4 to -78,13	Yes	***	0.0002	A-D
P30 vs. P45	-83.67	-152,4 to -14,96	Yes	*	0.0167	B-C
P30 vs. P60	-95.47	-164,2 to -26,76	Yes	**	0.0071	B-D
P45 vs. P60	-11.8	-75,41 to 51,81	No	ns	0.9423	C-D
Test details	Mean 1	Mean 2	Mean Diff,	SE of diff,	n1	n2	q	DF
P20 vs. P30	86.86	133.1	-46.27	22.83	4	3	2.866	11
P20 vs. P45	86.86	216.8	-129.9	21.14	4	4	8.694	11
P20 vs. P60	86.86	228.6	-141.7	21.14	4	4	9.484	11
P30 vs. P45	133.1	216.8	-83.67	22.83	3	4	5.183	11
P30 vs. P60	133.1	228.6	-95.47	22.83	3	4	5.914	11
P45 vs. P60	216.8	228.6	-11.8	21.14	4	4	0.7895	11
