# Supplementary material for: Ephrin-B1 regulates the adult diastolic function through a late postnatal maturation of cardiomyocyte surface crests
Source: eLife. 2023 Jan 17;12:e80904. doi: 10.7554/eLife.80904 (PMC9844986; doi:10.7554/eLife.80904)
Supplement: Figure 4—figure supplement 2—source data 1. [file elife-80904-fig4-figsupp2-data1.xlsx]

## Sheet: Figure 4-figure supplement 2
Figure 4-figure supplement 2
CM size (µm)						Statistics				Statistics
long axis		short axis				Table Analyzed	Long axis			Table Analyzed	Short axis
P20	P60	P20	P60
73.46	101.2	9.71	30.23			Column A	P20			Column D	P60
58.11	114.82	15.65	31.63			vs.	vs,			vs.	vs,
52.56	141.79	12.08	20.01			Column B	P60			Column C	P20
57.35	134.27	15.51	20.77
91.43	133.45	13.42	44.09			Unpaired t test				Unpaired t test
87.91	122.5	10.55	30.38			P value	<0,0001			P value	<0,0001
95.19	149.74	24.52	40.74			P value summary	****			P value summary	****
82.58	103.2	15.71	56.12			Significantly different (P < 0.05)?	Yes			Significantly different (P < 0.05)?	Yes
90.38	157.28	18.53	35.94			One- or two-tailed P value?	Two-tailed			One- or two-tailed P value?	Two-tailed
69.43	123.82	17.74	28			t, df	t=28,52, df=369			t, df	t=17,75, df=369
101.32	123.69	14.98	45.15
54.9	148.67	14.76	47.24			How big is the difference?				How big is the difference?
50.69	146.27	13.42	36.49			Mean of column A	67.88			Mean of column C	17.82
56.63	116.45	20.92	21.94			Mean of column B	123.3			Mean of column D	34.02
26.53	143.66	19	23.02			Difference between means (A - B) ± SEM	-55,43 ± 1,943			Difference between means (D - C) ± SEM	16,20 ± 0,9128
70.98	145.11	11.29	44.12			95% confidence interval	-59,25 to -51,61			95% confidence interval	14,41 to 18,00
59.6	94.64	15.15	32.92			R squared (eta squared)	0.688			R squared (eta squared)	0.4607
80.48	95.5	15	24.48
60.46	110.66	16.41	42			F test to compare variances				F test to compare variances
69.62	116.41	18.58	45.69			F, DFn, Dfd	1,679, 197, 172			F, DFn, Dfd	1,768, 197, 172
102.77	101.06	28.51	37.61			P value	0.0005			P value	0.0001
64.18	173.07	17.49	32.41			P value summary	***			P value summary	***
56.12	139.71	19.39	21.83			Significantly different (P < 0.05)?	Yes			Significantly different (P < 0.05)?	Yes
66.92	132.87	20.58	27.09
73.65	124.57	24.75	31.82			Data analyzed				Data analyzed
70.62	135.05	17.01	24.65			Sample size, column A	173			Sample size, column C	173
49.86	115.69	14.52	32.96			Sample size, column B	198			Sample size, column D	198
56.42	145.37	18.12	28
72.63	101.84	15.73	33.67
64.55	115.47	19.77	30.58
52.22	134.85	23.03	35.49
65.81	103.73	65.81	28.56
50.3	115.21	50.3	46.48
51.22	94.87	51.22	24.81
54.55	137.65	54.55	41.29
71.81	115.45	13.73	30.99
50.85	128.39	15.05	36.54
51.96	132.66	12.96	33.67
58.25	104.59	15.8	27.1
67.99	140.61	23.09	25.58
75.71	124.91	27.68	32.9
42.28	107.92	13.87	27.74
60.97	111.73	18.58	39.56
52.65	132.13	13.68	27.12
52.78	144.71	24.4	23.93
70.38	70.13	13.71	26
83.88	95.6	12.93	30.12
65.9	141.14	17.79	24.59
66.19	135.49	27.26	15.53
41.06	129.56	13.4	43.48
55.92	123.13	20.6	42.48
64.11	120.96	19.2	27.7
53.02	140.58	19.99	32.33
68.6	150.11	14.94	30.32
64.67	163.23	17.1	33.45
50.43	135	15.56	27.37
69.26	144.53	13.06	23.36
51.47	141.77	11.35	32.9
68.17	84.24	12.56	37.75
65.71	95.85	16.21	32.41
60.6	115.72	13.87	27.1
66.99	131.18	9.01	32.89
89.78	96.8	18.39	45.98
67.21	154.2	15.24	22.9
60.15	107.04	17.19	18.84
67.74	102.22	12.03	34.14
58.72	100.57	19.39	34.06
76.76	139.71	15.57	35.26
57.53	129.01	14.39	42.57
53.13	121.29	9.41	32.92
50.75	127.34	15.8	28.03
71.85	125.18	16.62	20.53
58.29	124.91	17.44	33.2
57.4	99.63	19.22	41.57
66.7	115.88	24.84	26.84
62.73	141.14	14.45	44.25
73.77	115.38	17.71	38.72
58.86	102.65	13.31	31.86
75.01	113.21	11.9	22.57
79.85	108.76	17.01	27.01
58.21	116.96	15.7	30.97
70.55	135.29	21.12	50.69
78.96	150.33	27.54	32.48
69.99	90.75	18.8	26.52
57.17	89.19	13.69	32.35
78.92	98.12	12.37	41.77
55.19	145.18	12.08	46.96
36.91	92.2	17.38	42.65
55.14	69.96	14.39	39.68
73.55	96.28	21.85	26
81.97	109.67	15.72	33.95
68.33	120.62	15.8	27.1
83.24	116.52	23.7	28.27
74.57	108.57	18.98	26.83
73.3	98.56	10.64	32.95
50.43	116.47	12.86	40.22
65.72	85.87	16.53	35.48
58.45	118.74	17.44	22.88
77.98	135.03	15.35	30.56
68.61	114.05	21.65	33.56
72.64	130.45	30.29	37.86
66.42	111.59	16.84	29.32
82.56	114.85	18.71	28.17
62.81	130.43	14.35	30.7
48.75	130.45	22.32	36.55
65.44	116.34	12.13	29.03
87.08	102.22	15.51	61.79
73.23	95.79	18.1	23.62
44.6	121.16	14.56	44.55
98.96	194.83	15.4	43.14
74.58	106.81	17.74	42.76
75.73	163.1	15.65	29.03
71.55	118.85	19.76	30.01
45.41	97.79	11.99	28
86.91	120.5	14.45	34.73
93.23	133.99	14.25	44.8
88.25	135.95	15.72	21.44
55.52	135.06	16.6	43.48
146.23	119.97	27.26	18.36
80.67	123.7	19.9	24.38
92.86	111.95	22.98	56.09
57.98	141.15	13.8	33.3
56.88	146.78	16.14	31.77
96.7	130.6	18.61	20.24
66.57	96.76	20.22	36.79
50.87	100.84	14.56	25.61
58.01	115.94	18.7	35.21
109.79	110.3	21.16	23.87
70.39	129.65	24.05	31.02
93.46	103.85	16.62	26.45
107.23	154.83	11.63	18.8
67.12	78.3	17.74	57.75
80.76	126.14	11.35	24.89
58.15	173.34	11.35	32.35
73.27	160.89	14.25	50.63
42.73	122.65	10.08	50.38
73.29	114.41	12.75	23.31
59.26	158.54	21.4	18.35
70.72	156.74	28.46	33.54
80.9	158.14	23.91	26.76
63.36	122.35	26.65	53.55
55.27	112.79	13.79	28.32
58.66	119.62	15.74	21
73.3	112.23	14.41	37.57
56.85	112.51	13.78	40
92.57	132.81	14.87	24.9
49.72	119.14	12.15	37.99
50.07	97.19	13.03	36.38
64.17	112.63	16.11	38.5
57.49	103.85	11.09	24.38
68.6	159.22	15.51	50.07
106.84	112.71	7.3	20.24
50.1	126	12.31	42.61
74.25	116.5	27.42	49.33
101.14	136.9	9.41	33.86
56.94	124.64	19.03	31.76
65.06	120.57	14.61	36.36
90.73	166.04	27.51	51.7
54.21	103.85	17.11	39.43
80.08	117.78	15.8	38.71
60.72	136.81	15.7	49.83
87.51	85.47	20.37	14.85
60.49	102.38	16.25	30.58
75.91	117.44	16.09	50.33
61.71	144.19	20.19	85.03
65.64	106.13	10.28	21.06
84.66	146.66	13.01	26
76.23	142.11	14.41	56.76
47.33	116.9	18.12	41.37
67.9	159.82	26.33	24.82
49.6	104.52	18.71	25.29
56.45	135.93	18.21	43.9
75.56	108.53	21.29	38.5
	103.63		37.79
	129.14		30.59
	144.47		35.69
	138.16		23.08
	102.34		40.64
	127.13		51.22
	108.69		38.32
	101.93		38.5
	103.93		36.63
	141.81		33.99
	143.47		29.7
	110.83		20.24
	95.33		50.46
	136.77		34.64
	130.95		31.03
	138.71		34.19
	132.04		29.25
	147.13		34.42
	112.4		33.6
	136.16		28.41
	145.7		39.65
	140.87		32.02
	116.56		34.41
	147.29		47.12
	159.05		40.8
