# Supplementary material for: Ephrin-B1 regulates the adult diastolic function through a late postnatal maturation of cardiomyocyte surface crests
Source: eLife. 2023 Jan 17;12:e80904. doi: 10.7554/eLife.80904 (PMC9844986; doi:10.7554/eLife.80904)
Supplement: Figure 4—figure supplement 3—source data 1. [file elife-80904-fig4-figsupp3-data1.xlsx]

## Sheet: Feuil1
Figure 4-figure supplement 3A
CM cross-sectional area (µm2)
P20	P60
134.2	358.7
170.2	344.6
169.5	358.5
129.5	300.1
113.2	307.5
Statistics
Table Analyzed	CM cross-sectional area
Column B	P60
vs.	vs,
Column A	P20
Unpaired t test
P value	<0,0001
P value summary	****
Significantly different (P < 0.05)?	Yes
One- or two-tailed P value?	Two-tailed
t, df	t=11,23, df=8
How big is the difference?
Mean of column A	143.3
Mean of column B	333.9
Difference between means (B - A) ± SEM	190,6 ± 16,98
95% confidence interval	151,4 to 229,7
R squared (eta squared)	0.9403
F test to compare variances
F, DFn, Dfd	1,226, 4, 4
P value	0.8483
P value summary	ns
Significantly different (P < 0.05)?	No
Data analyzed
Sample size, column A	5
Sample size, column B	5
