# Supplementary material for: Ephrin-B1 regulates the adult diastolic function through a late postnatal maturation of cardiomyocyte surface crests
Source: eLife. 2023 Jan 17;12:e80904. doi: 10.7554/eLife.80904 (PMC9844986; doi:10.7554/eLife.80904)
Supplement: Figure 4—figure supplement 3—source data 2. [file elife-80904-fig4-figsupp3-data2.xlsx]

## Sheet: Feuil1
Figure 4-figure supplement 3B
CM short axis (µm)				CM long axis (µm)
P20	P60			P20	P60
9.93928	14.06			63.7622	120.996
8.62448	20.9286			74.79	101.209
9.59555	13.771			77.5322	102.398
11.0094	18.8929			80.9511	105.166
9.54684	19.214			76.688
9.93928	21.1114			77.774
9.3275	21.2005			75.19
9.51727	12.3285			79.1943
9.73059	14.7183			81.228
7.10278	14.7183			77.8929
8.9615	17.563
7.975	19.2006
11.1394	18.1383
	13.3908
	15.0054
	14.6431
	14.2886
Statistics				Statistics
Table Analyzed	CM short axis			Table Analyzed	CM long axis
Column B	P60			Column B	P60
vs.	vs,			vs.	vs,
Column A	P20			Column A	P20
Unpaired t test				Unpaired t test
P value	<0,0001			P value	<0,0001
P value summary	****			P value summary	****
Significantly different (P < 0.05)?	Yes			Significantly different (P < 0.05)?	Yes
One- or two-tailed P value?	Two-tailed			One- or two-tailed P value?	Two-tailed
t, df	t=8,257, df=28			t, df	t=8,320, df=12
How big is the difference?				How big is the difference?
Mean of column A	9.416			Mean of column A	76.5
Mean of column B	16.66			Mean of column B	107.4
Difference between means (B - A) ± SEM	7,241 ± 0,8769			Difference between means (B - A) ± SEM	30,94 ± 3,719
95% confidence interval	5,445 to 9,038			95% confidence interval	22,84 to 39,04
R squared (eta squared)	0.7089			R squared (eta squared)	0.8523
F test to compare variances				F test to compare variances
F, DFn, Dfd	7,464, 16, 12			F, DFn, Dfd	3,437, 3, 9
P value	0.0011			P value	0.1309
P value summary	**			P value summary	ns
Significantly different (P < 0.05)?	Yes			Significantly different (P < 0.05)?	No
Data analyzed				Data analyzed
Sample size, column A	13			Sample size, column A	10
Sample size, column B	17			Sample size, column B	4
