# Supplementary material for: Ephrin-B1 regulates the adult diastolic function through a late postnatal maturation of cardiomyocyte surface crests
Source: eLife. 2023 Jan 17;12:e80904. doi: 10.7554/eLife.80904 (PMC9844986; doi:10.7554/eLife.80904)
Supplement: Figure 4—source data 1. [file elife-80904-fig4-data1.xlsx]

## Sheet: Feuil1
Figure 4A
CM cross-sectional area (μm2)
P20	P60
80.9	235
75.4	175.6
80.54	226.3
110.6	277.5
Statistics
Table Analyzed	CSA mean
Column B	P60
vs.	vs,
Column A	P20
Unpaired t test
P value	0.0007
P value summary	***
Significantly different (P < 0.05)?	Yes
One- or two-tailed P value?	Two-tailed
t, df	t=6,330, df=6
How big is the difference?
Mean of column A	86.86
Mean of column B	228.6
Difference between means (B - A) ± SEM	141,7 ± 22,39
95% confidence interval	86,95 to 196,5
R squared (eta squared)	0.8698
F test to compare variances
F, DFn, Dfd	6,810, 3, 3
P value	0.1494
P value summary	ns
Significantly different (P < 0.05)?	No
Data analyzed
Sample size, column A	4
Sample size, column B	4
