# Supplementary material for: Ephrin-B1 regulates the adult diastolic function through a late postnatal maturation of cardiomyocyte surface crests
Source: eLife. 2023 Jan 17;12:e80904. doi: 10.7554/eLife.80904 (PMC9844986; doi:10.7554/eLife.80904)
Supplement: Figure 4—source data 2. [file elife-80904-fig4-data2.xlsx]

## Sheet: Feuil1
Figure 4B
CM long axis (µm)				CM short axis (µm)
P20	P60			P20	P60
66.53	78.31			11.09	14.95
60.82	100.5			10.02	15.43
68.87	85.96			12.57	12.61
63.51	97.68			9.666	15.82
Statistics				Statistics
Table Analyzed	Long axis			Table Analyzed	Short axis
Column B	P60			Column B	P60
vs.	vs,			vs.	vs,
Column A	P20			Column A	P20
Unpaired t test				Unpaired t test
P value	0.0033			P value	0.0073
P value summary	**			P value summary	**
Significantly different (P < 0.05)?	Yes			Significantly different (P < 0.05)?	Yes
One- or two-tailed P value?	Two-tailed			One- or two-tailed P value?	Two-tailed
t, df	t=4,704, df=6			t, df	t=3,980, df=6
How big is the difference?				How big is the difference?
Mean of column A	64.93			Mean of column A	10.84
Mean of column B	90.61			Mean of column B	14.7
Difference between means (B - A) ± SEM	25,68 ± 5,460			Difference between means (B - A) ± SEM	3,866 ± 0,9714
95% confidence interval	12,32 to 39,04			95% confidence interval	1,489 to 6,243
R squared (eta squared)	0.7867			R squared (eta squared)	0.7253
F test to compare variances				F test to compare variances
F, DFn, Dfd	8,670, 3, 3			F, DFn, Dfd	1,218, 3, 3
P value	0.1093			P value	0.8752
P value summary	ns			P value summary	ns
Significantly different (P < 0.05)?	No			Significantly different (P < 0.05)?	No
Data analyzed				Data analyzed
Sample size, column A	4			Sample size, column A	4
Sample size, column B	4			Sample size, column B	4
