# Supplementary material for: Ephrin-B1 regulates the adult diastolic function through a late postnatal maturation of cardiomyocyte surface crests
Source: eLife. 2023 Jan 17;12:e80904. doi: 10.7554/eLife.80904 (PMC9844986; doi:10.7554/eLife.80904)
Supplement: Figure 4—source data 3. [file elife-80904-fig4-data3.xlsx]

## Sheet: Feuil1
Figure 4C
LVPWd (mm)				LVEDD (mm)				LVEDV (µL)
P20	P60			P20	P60			P20	P60
1.3622	2.3402			5.6149	7.02059			154.606	257.123
1.59075	2.08087			4.53533	7.28303			94.1581	279.269
1.58699	1.74261			5.00783	7.9793			118.674	342.63
1.60564	1.95906			4.81692	7.48797			108.406	297.223
1.62989	1.805			4.88967	7.8375			112.261	329.183
1.68906	2.42293			5.75	7.17561			163.284	270.09
1.742	2.29125			4.73298	7.41			104.047	290.325
1.6425	2.2047			6.11375	8.02134			187.888	346.67
1.72598	2.11593			6.08634	7.82404			185.971	327.92
1.64022	1.96831			6.05618	7.82404			183.874	327.92
Statistics				Statistics				Statistics
Table Analyzed	LVPWd			Table Analyzed	LVEDD			Table Analyzed	LV Vol,d
Column B	P60			Column B	P60			Column B	P60
vs.	vs,			vs.	vs,			vs.	vs,
Column A	P20			Column A	P20			Column A	P20
Unpaired t test				Unpaired t test				Unpaired t test
P value	<0,0001			P value	<0,0001			P value	<0,0001
P value summary	****			P value summary	****			P value summary	****
Significantly different (P < 0.05)?	Yes			Significantly different (P < 0.05)?	Yes			Significantly different (P < 0.05)?	Yes
One- or two-tailed P value?	Two-tailed			One- or two-tailed P value?	Two-tailed			One- or two-tailed P value?	Two-tailed
t, df	t=5,967, df=18			t, df	t=9,791, df=18			t, df	t=10,61, df=18
How big is the difference?				How big is the difference?				How big is the difference?
Mean of column A	1.622			Mean of column A	5.36			Mean of column A	141.3
Mean of column B	2.093			Mean of column B	7.586			Mean of column B	306.8
Difference between means (B - A) ± SEM	0,4716 ± 0,07903			Difference between means (B - A) ± SEM	2,226 ± 0,2274			Difference between means (B - A) ± SEM	165,5 ± 15,60
95% confidence interval	0,3055 to 0,6376			95% confidence interval	1,748 to 2,704			95% confidence interval	132,8 to 198,3
R squared (eta squared)	0.6642			R squared (eta squared)	0.8419			R squared (eta squared)	0.8622
F test to compare variances				F test to compare variances				F test to compare variances
F, DFn, Dfd	4,594, 9, 9			F, DFn, Dfd	3,076, 9, 9			F, DFn, Dfd	1,378, 9, 9
P value	0.033			P value	0.1095			P value	0.6402
P value summary	*			P value summary	ns			P value summary	ns
Significantly different (P < 0.05)?	Yes			Significantly different (P < 0.05)?	No			Significantly different (P < 0.05)?	No
Data analyzed				Data analyzed				Data analyzed
Sample size, column A	10			Sample size, column A	10			Sample size, column A	10
Sample size, column B	10			Sample size, column B	10			Sample size, column B	10
