# Supplementary material for: Ephrin-B1 regulates the adult diastolic function through a late postnatal maturation of cardiomyocyte surface crests
Source: eLife. 2023 Jan 17;12:e80904. doi: 10.7554/eLife.80904 (PMC9844986; doi:10.7554/eLife.80904)
Supplement: Figure 4—source data 4. [file elife-80904-fig4-data4.xlsx]

## Sheet: Feuil1
Figure 4D
Myofibril number
P20	P60
10	14.8
9.2	11.25
9.444	13.33
10.67	10
10.5	11.6
11.2	10
Statistics
Table Analyzed	Myofibril number P60 vs P20
Column B	P60
vs.	vs,
Column A	P20
Unpaired t test
P value	0.0757
P value summary	ns
Significantly different (P < 0.05)?	No
One- or two-tailed P value?	Two-tailed
t, df	t=1,982, df=10
How big is the difference?
Mean of column A	10.17
Mean of column B	11.83
Difference between means (B - A) ± SEM	1,661 ± 0,8381
95% confidence interval	-0,2065 to 3,529
R squared (eta squared)	0.282
F test to compare variances
F, DFn, Dfd	6,226, 5, 5
P value	0.0663
P value summary	ns
Significantly different (P < 0.05)?	No
Data analyzed
Sample size, column A	6
Sample size, column B	6
