# Supplementary material for: Ephrin-B1 regulates the adult diastolic function through a late postnatal maturation of cardiomyocyte surface crests
Source: eLife. 2023 Jan 17;12:e80904. doi: 10.7554/eLife.80904 (PMC9844986; doi:10.7554/eLife.80904)
Supplement: Figure 4—source data 5. [file elife-80904-fig4-data5.xlsx]

## Sheet: Feuil1
Figure 4E
HW / BW
P20	P60
9.00415	7.93313
10.153	7.78778
9.56522	7.33627
10.9025	7.5
12.0925	8.56898
11.6016	7.69282
11.0345	7.80566
13.8685	8.57741
12.7259	8.11254
11.4901	8.21853
Statistics
Table Analyzed	Heart weight / body weight
Column B	P60
vs.	vs,
Column A	P20
Unpaired t test
P value	<0,0001
P value summary	****
Significantly different (P < 0.05)?	Yes
One- or two-tailed P value?	Two-tailed
t, df	t=6,853, df=18
How big is the difference?
Mean of column A	11.24
Mean of column B	7.953
Difference between means (B - A) ± SEM	-3,290 ± 0,4801
95% confidence interval	-4,299 to -2,282
R squared (eta squared)	0.7229
F test to compare variances
F, DFn, Dfd	12,23, 9, 9
P value	0.001
P value summary	***
Significantly different (P < 0.05)?	Yes
Data analyzed
Sample size, column A	10
Sample size, column B	10
