# Supplementary material for: Ephrin-B1 regulates the adult diastolic function through a late postnatal maturation of cardiomyocyte surface crests
Source: eLife. 2023 Jan 17;12:e80904. doi: 10.7554/eLife.80904 (PMC9844986; doi:10.7554/eLife.80904)
Supplement: Figure 4—source data 6. [file elife-80904-fig4-data6.xlsx]

## Sheet: Feuil1
Figure 4F
Sarcomere height (µm)								Sarcomere length (µm)
P20			P60					P20	P60
Mean	SD	N	Mean	SD	N			1.181	1.058
0.3307	0.07193	59	0.7733	0.1689	72			1.299	1.219
0.2966	0.1056	30	0.7121	0.1219	38			1.248	1.187
0.2544	0.06161	37	0.5907	0.09193	41			1.325	1.216
0.2706	0.05159	16	0.5378	0.09361	17			1.194	1.037
0.5302	0.09474	27	0.5161	0.09044	10			1.157	1.2
0.354	0.04042	16	0.6496	0.1224	29
Statistics								Statistics
Table Analyzed	Z strike height P60 vs P20							Table Analyzed	Longueur sarcomere sous crete P20 vs P60
Column B	P60							Column B	P60
vs.	vs,							vs.	vs,
Column A	P20							Column A	P20
Unpaired t test								Unpaired t test
P value	0.0005							P value	0.0927
P value summary	***							P value summary	ns
Significantly different (P < 0.05)?	Yes							Significantly different (P < 0.05)?	No
One- or two-tailed P value?	Two-tailed							One- or two-tailed P value?	Two-tailed
t, df	t=5,003, df=10							t, df	t=1,859, df=10
How big is the difference?								How big is the difference?
Mean of column A	0.3394							Mean of column A	1.234
Mean of column B	0.6299							Mean of column B	1.153
Difference between means (B - A) ± SEM	0,2905 ± 0,05807							Difference between means (B - A) ± SEM	-0,08117 ± 0,04367
95% confidence interval	0,1611 to 0,4199							95% confidence interval	-0,1785 to 0,01614
R squared (eta squared)	0.7145							R squared (eta squared)	0.2568
F test to compare variances								F test to compare variances
F, DFn, Dfd	1,004, 5, 5							F, DFn, Dfd	1,483, 5, 5
P value	0.9967							P value	0.6759
P value summary	ns							P value summary	ns
Significantly different (P < 0.05)?	No							Significantly different (P < 0.05)?	No
Data analyzed								Data analyzed
Sample size, column A	6							Sample size, column A	6
Sample size, column B	6							Sample size, column B	6
