# Supplementary material for: Ephrin-B1 regulates the adult diastolic function through a late postnatal maturation of cardiomyocyte surface crests
Source: eLife. 2023 Jan 17;12:e80904. doi: 10.7554/eLife.80904 (PMC9844986; doi:10.7554/eLife.80904)
Supplement: Figure 4—source data 7. [file elife-80904-fig4-data7.xlsx]

## Sheet: Feuil1
Figure 4G
Inter-lateral space (µm)
P20	P60
0.3143	0.1948
0.3805	0.2605
0.4043	0.1775
0.4725	0.2174
0.338	0.2166
Statistics
Table Analyzed	Membrane lateral
Column B	P60
vs.	vs,
Column A	P20
Unpaired t test
P value	0.0006
P value summary	***
Significantly different (P < 0.05)?	Yes
One- or two-tailed P value?	Two-tailed
t, df	t=5,456, df=8
How big is the difference?
Mean of column A	0.3819
Mean of column B	0.2134
Difference between means (B - A) ± SEM	-0,1686 ± 0,03089
95% confidence interval	-0,2398 to -0,09732
R squared (eta squared)	0.7882
F test to compare variances
F, DFn, Dfd	3,920, 4, 4
P value	0.2142
P value summary	ns
Significantly different (P < 0.05)?	No
Data analyzed
Sample size, column A	5
Sample size, column B	5
