# Supplementary material for: Ephrin-B1 regulates the adult diastolic function through a late postnatal maturation of cardiomyocyte surface crests
Source: eLife. 2023 Jan 17;12:e80904. doi: 10.7554/eLife.80904 (PMC9844986; doi:10.7554/eLife.80904)
Supplement: Figure 5—source data 1. [file elife-80904-fig5-data1.xlsx]

## Sheet: Feuil1
Figure 5A
Ephrin-B1 protein expression (A.U.)
P0	P3	P5	P10	P20	P60
0.73193	0.848529	1.96001	1.74562	2.01478	3.12843
0.394263	0.917691	2.02952	1.63067	1.82473	1.86277
0.234407	0.26531	0.735214	1.7847	1.61308	1.72774
0.0909744	0.449825	1.83115	1.43187	1.47858	1.55688
0.111557	0.206259	1.80338	2.53652	2.00391	1.6572
0.16707	0.982237	1.7513	2.17518	1.33254	1.88954
	0.639444	1.54521	2.85554	2.42288	1.7423
			1.90325	1.44006	2.60284
					1.67622
Statistics
Number of families	1
Number of comparisons per family	15
Alpha	0.05
Tukey's multiple comparisons test	Mean Diff,	95,00% CI of diff,	Significant?	Summary	Adjusted P Value
P0 vs. P3	-0.3272	-1,026 to 0,3715	No	ns	0.725	A-B
P0 vs. P5	-1.377	-2,076 to -0,6780	Yes	****	<0,0001	A-C
P0 vs. P10	-1.72	-2,398 to -1,041	Yes	****	<0,0001	A-D
P0 vs. P20	-1.478	-2,156 to -0,7996	Yes	****	<0,0001	A-E
P0 vs. P60	-1.694	-2,356 to -1,032	Yes	****	<0,0001	A-F
P3 vs. P5	-1.049	-1,721 to -0,3781	Yes	***	0.0005	B-C
P3 vs. P10	-1.392	-2,042 to -0,7423	Yes	****	<0,0001	B-D
P3 vs. P20	-1.151	-1,801 to -0,5007	Yes	****	<0,0001	B-E
P3 vs. P60	-1.367	-2,000 to -0,7341	Yes	****	<0,0001	B-F
P5 vs. P10	-0.3428	-0,9929 to 0,3072	No	ns	0.6162	C-D
P5 vs. P20	-0.1012	-0,7513 to 0,5488	No	ns	0.997	C-E
P5 vs. P60	-0.3175	-0,9505 to 0,3154	No	ns	0.6644	C-F
P10 vs. P20	0.2416	-0,3864 to 0,8696	No	ns	0.856	D-E
P10 vs. P60	0.02526	-0,5851 to 0,6356	No	ns	>0,9999	D-F
P20 vs. P60	-0.2163	-0,8267 to 0,3940	No	ns	0.8933	E-F
Test details	Mean 1	Mean 2	Mean Diff,	SE of diff,	n1	n2	q	DF
P0 vs. P3	0.2884	0.6156	-0.3272	0.2332	6	7	1.984	39
P0 vs. P5	0.2884	1.665	-1.377	0.2332	6	7	8.348	39
P0 vs. P10	0.2884	2.008	-1.72	0.2264	6	8	10.74	39
P0 vs. P20	0.2884	1.766	-1.478	0.2264	6	8	9.232	39
P0 vs. P60	0.2884	1.983	-1.694	0.221	6	9	10.84	39
P3 vs. P5	0.6156	1.665	-1.049	0.2241	7	7	6.623	39
P3 vs. P10	0.6156	2.008	-1.392	0.217	7	8	9.075	39
P3 vs. P20	0.6156	1.766	-1.151	0.217	7	8	7.5	39
P3 vs. P60	0.6156	1.983	-1.367	0.2113	7	9	9.151	39
P5 vs. P10	1.665	2.008	-0.3428	0.217	7	8	2.234	39
P5 vs. P20	1.665	1.766	-0.1012	0.217	7	8	0.6597	39
P5 vs. P60	1.665	1.983	-0.3175	0.2113	7	9	2.126	39
P10 vs. P20	2.008	1.766	0.2416	0.2096	8	8	1.63	39
P10 vs. P60	2.008	1.983	0.02526	0.2037	8	9	0.1754	39
P20 vs. P60	1.766	1.983	-0.2163	0.2037	8	9	1.502	39
