# Supplementary material for: Ephrin-B1 regulates the adult diastolic function through a late postnatal maturation of cardiomyocyte surface crests
Source: eLife. 2023 Jan 17;12:e80904. doi: 10.7554/eLife.80904 (PMC9844986; doi:10.7554/eLife.80904)
Supplement: Figure 5—source data 2. [file elife-80904-fig5-data2.xlsx]

## Sheet: Feuil1
Figure 5B
CM cross-sectional area (µm2)
P20 WT	P20 KO	P60 WT	P60 KO
134.2	167	358.7	247.3
170.2	129.7	344.6	227.8
169.5	115.5	358.5	241.7
129.5	125	300.1	257.6
113.2		307.5	246.9
			225.2
Statistics
Number of families	1
Number of comparisons per family	6
Alpha	0.05
Tukey's multiple comparisons test	Mean Diff,	95,00% CI of diff,	Below threshold?	Summary	Adjusted P Value
P20 WT vs. P20 cKO	9.02	-34,08 to 52,12	No	ns	0.9309	A-B
P20 WT vs. P60 WT	-190.6	-231,2 to -149,9	Yes	****	<0,0001	A-C
P20 WT vs. P60 cKO	-97.76	-136,7 to -58,86	Yes	****	<0,0001	A-D
P20 cKO vs. P60 WT	-199.6	-242,7 to -156,5	Yes	****	<0,0001	B-C
P20 cKO vs. P60 cKO	-106.8	-148,3 to -65,31	Yes	****	<0,0001	B-D
P60 WT vs. P60 cKO	92.8	53,89 to 131,7	Yes	****	<0,0001	C-D
Test details	Mean 1	Mean 2	Mean Diff,	SE of diff,	n1	n2	q	DF
P20 WT vs. P20 cKO	143.3	134.3	9.02	15.06	5	4	0.8468	16
P20 WT vs. P60 WT	143.3	333.9	-190.6	14.2	5	5	18.98	16
P20 WT vs. P60 cKO	143.3	241.1	-97.76	13.6	5	6	10.17	16
P20 cKO vs. P60 WT	134.3	333.9	-199.6	15.06	4	5	18.74	16
P20 cKO vs. P60 cKO	134.3	241.1	-106.8	14.5	4	6	10.42	16
P60 WT vs. P60 cKO	333.9	241.1	92.8	13.6	5	6	9.651	16
