# Supplementary material for: Ephrin-B1 regulates the adult diastolic function through a late postnatal maturation of cardiomyocyte surface crests
Source: eLife. 2023 Jan 17;12:e80904. doi: 10.7554/eLife.80904 (PMC9844986; doi:10.7554/eLife.80904)
Supplement: Figure 5—source data 3. [file elife-80904-fig5-data3.xlsx]

## Sheet: Feuil1
Figure 5C
Myofibril number
P20 WT			P20 KO			P60 WT			P60 KO
Mean	SD	N	Mean	SD	N	Mean	SD	N	Mean	SD	N
11.67	2.517	3	13	2.16	4	10.71	1.976	7	14.2	4	3
12.75	1.893	4	10.33	2.503	6	11.33	4.509	3	14.33	0.5774	3
11.86	2.545	7	12	1.414	5	15	3.808	5	12.4	2.408	5
14.67	0.5774	3	9.75	2.062	4	12	1.265	6	15	2.55	5
10.25	1.258	4				12.6	3.209	5	13.5	0.7071	2
									13.6	2.966	5
Statistics
Table Analyzed	Myofibril number Mice
Data sets analyzed	A-D
ANOVA summary
F	2.854
P value	0.07
P value summary	ns
Significant diff. among means (P < 0.05)?	No
R squared	0.3486
Brown-Forsythe test
F (DFn, DFd)	0,4128 (3, 16)
P value	0.7461
P value summary	ns
Are SDs significantly different (P < 0.05)?	No
Bartlett's test
Bartlett's statistic (corrected)	1.824
P value	0.6097
P value summary	ns
Are SDs significantly different (P < 0.05)?	No
ANOVA table	SS	DF	MS	F (DFn, DFd)	P value
Treatment (between columns)	17.24	3	5.746	F (3, 16) = 2,854	P=0,0700
Residual (within columns)	32.21	16	2.013
Total	49.45	19
Data summary
Number of treatments (columns)	4
Number of values (total)	20
Number of families	1
Number of comparisons per family	6
Alpha	0.05
Tukey's multiple comparisons test	Mean Diff,	95,00% CI of diff,	Below threshold?	Summary	Adjusted P Value
P20 WT vs. P20 KO	0.97	-1,753 to 3,693	No	ns	0.7409	A-B
P20 WT vs. P60 WT	-0.088	-2,655 to 2,479	No	ns	0.9996	A-C
P20 WT vs. P60 KO	-1.598	-4,056 to 0,8598	No	ns	0.2831	A-D
P20 KO vs. P60 WT	-1.058	-3,781 to 1,665	No	ns	0.6878	B-C
P20 KO vs. P60 KO	-2.568	-5,189 to 0,05202	No	ns	0.0557	B-D
P60 WT vs. P60 KO	-1.51	-3,968 to 0,9478	No	ns	0.3282	C-D
Test details	Mean 1	Mean 2	Mean Diff,	SE of diff,	n1	n2	q	DF
P20 WT vs. P20 KO	12.24	11.27	0.97	0.9518	5	4	1.441	16
P20 WT vs. P60 WT	12.24	12.33	-0.088	0.8974	5	5	0.1387	16
P20 WT vs. P60 KO	12.24	13.84	-1.598	0.8592	5	6	2.631	16
P20 KO vs. P60 WT	11.27	12.33	-1.058	0.9518	4	5	1.572	16
P20 KO vs. P60 KO	11.27	13.84	-2.568	0.9159	4	6	3.966	16
P60 WT vs. P60 KO	12.33	13.84	-1.51	0.8592	5	6	2.486	16
