# Supplementary material for: Ephrin-B1 regulates the adult diastolic function through a late postnatal maturation of cardiomyocyte surface crests
Source: eLife. 2023 Jan 17;12:e80904. doi: 10.7554/eLife.80904 (PMC9844986; doi:10.7554/eLife.80904)
Supplement: Figure 5—source data 4. [file elife-80904-fig5-data4.xlsx]

## Sheet: Feuil1
Figure 5D
CM short axis (µm)											CM long axis (µm)
P20 WT	P20 KO	P60 WT	P60 KO								P20 WT	P20 KO	P60 WT	P60 KO
11.6	10.25	17.27	13.48								78.13	70.43	133.3	143.5
8.846	11.33	17.68	15.8								74.5	72.81	98.13	109.4
11.04	10.96	16.9	11.53								72.96	77.14	114.9	140.6
11.19	10.56	16.49	10.2								68.7	68.57	118.4	94.05
		18.31	12.68										104.5	115.5
Statistics											Statistics
Number of families	1										Number of families	1
Number of comparisons per family	6										Number of comparisons per family	6
Alpha	0.05										Alpha	0.05
Tukey's multiple comparisons test	Mean Diff,	95,00% CI of diff,	Below threshold?	Summary	Adjusted P Value						Tukey's multiple comparisons test	Mean Diff,	95,00% CI of diff,	Below threshold?	Summary	Adjusted P Value
P20 WT vs. P20 cKO	-0.106	-2,856 to 2,644	No	ns	0.9995	A-B					P20 WT vs. P20 cKO	1.335	-26,69 to 29,36	No	ns	0.999	A-B
P20 WT vs. P60 WT	-6.661	-9,270 to -4,052	Yes	****	<0,0001	A-C					P20 WT vs. P60 WT	-40.27	-66,86 to -13,69	Yes	**	0.003	A-C
P20 WT vs. P60 cKO	-2.069	-4,678 to 0,5402	No	ns	0.144	A-D					P20 WT vs. P60 cKO	-47.04	-73,62 to -20,45	Yes	***	0.0008	A-D
P20 cKO vs. P60 WT	-6.555	-9,164 to -3,946	Yes	****	<0,0001	B-C					P20 cKO vs. P60 WT	-41.61	-68,19 to -15,03	Yes	**	0.0023	B-C
P20 cKO vs. P60 cKO	-1.963	-4,572 to 0,6462	No	ns	0.1748	B-D					P20 cKO vs. P60 cKO	-48.37	-74,96 to -21,79	Yes	***	0.0006	B-D
P60 WT vs. P60 cKO	4.592	2,132 to 7,052	Yes	***	0.0005	C-D					P60 WT vs. P60 cKO	-6.764	-31,83 to 18,30	No	ns	0.8603	C-D
Test details	Mean 1	Mean 2	Mean Diff,	SE of diff,	n1	n2	q	DF			Test details	Mean 1	Mean 2	Mean Diff,	SE of diff,	n1	n2	q	DF
P20 WT vs. P20 cKO	10.67	10.78	-0.106	0.9462	4	4	0.1584	14			P20 WT vs. P20 cKO	73.57	72.24	1.335	9.64	4	4	0.1958	14
P20 WT vs. P60 WT	10.67	17.33	-6.661	0.8977	4	5	10.49	14			P20 WT vs. P60 WT	73.57	113.8	-40.27	9.146	4	5	6.228	14
P20 WT vs. P60 cKO	10.67	12.74	-2.069	0.8977	4	5	3.259	14			P20 WT vs. P60 cKO	73.57	120.6	-47.04	9.146	4	5	7.274	14
P20 cKO vs. P60 WT	10.78	17.33	-6.555	0.8977	4	5	10.33	14			P20 cKO vs. P60 WT	72.24	113.8	-41.61	9.146	4	5	6.434	14
P20 cKO vs. P60 cKO	10.78	12.74	-1.963	0.8977	4	5	3.092	14			P20 cKO vs. P60 cKO	72.24	120.6	-48.37	9.146	4	5	7.48	14
P60 WT vs. P60 cKO	17.33	12.74	4.592	0.8463	5	5	7.673	14			P60 WT vs. P60 cKO	113.8	120.6	-6.764	8.623	5	5	1.109	14
