# Supplementary material for: Ephrin-B1 regulates the adult diastolic function through a late postnatal maturation of cardiomyocyte surface crests
Source: eLife. 2023 Jan 17;12:e80904. doi: 10.7554/eLife.80904 (PMC9844986; doi:10.7554/eLife.80904)
Supplement: Figure 5—source data 5. [file elife-80904-fig5-data5.xlsx]

## Sheet: Feuil1
Figure 5E
Crest height /sarcomere length														Mitochondria area (µm2)														Mitochondria number
P20 WT			P20 KO			P60 WT			P60 KO					P20 WT			P20 KO			P60 WT			P60 KO					P20 WT			P20 KO			P60 WT			P60 KO
Mean	SD	N	Mean	SD	N	Mean	SD	N	Mean	SD	N			Mean	SD	N	Mean	SD	N	Mean	SD	N	Mean	SD	N			Mean	SD	N	Mean	SD	N	Mean	SD	N	Mean	SD	N
0.5211	0.3937	78	0.4334	0.3157	27	0.6053	0.2276	87	0.3526	0.1767	41			0.3087	0.1764	45	0.1908	0.1265	20	0.345	0.2697	103	0.2056	0.155	17			0.5769	0.5227	78	0.6667	0.6202	27	1.184	0.5398	87	0.4146	0.5466	41
0.5318	0.2069	59	0.3288	0.1871	76	0.546	0.2182	32	0.2457	0.1193	39			0.1439	0.1146	38	0.1709	0.1029	51	0.3853	0.3645	43	0.2122	0.1279	16			0.7755	0.7975	49	0.68	0.524	75	1.344	0.7007	32	0.4103	0.6373	39
0.4584	0.334	60	0.3888	0.2538	57	0.683	0.2784	72	0.3033	0.1733	46			0.2964	0.1537	42	0.214	0.147	45	0.473	0.2567	69	0.2686	0.2238	23			0.75	0.58	56	0.7895	0.7959	57	0.9718	0.5338	71	0.5	0.5055	46
0.3876	0.1867	64	0.3816	0.1979	26	0.5459	0.155	54	0.2831	0.1531	62			0.2357	0.2674	50	0.2105	0.1341	45	0.3927	0.219	64	0.147	0.08526	28			0.7813	0.8992	64	0.6538	0.7971	26	1.185	0.552	54	0.4516	0.5917	62
0.3102	0.1787	34				0.6898	0.3165	37	0.2064	0.06975	23			0.227	0.1525	8				0.3906	0.2549	45	0.1706	0.08727	8			0.2353	0.4306	34				1.216	0.6296	37	0.3478	0.487	23
									0.2337	0.1616	110												0.2937	0.2186	47												0.4273	0.5495	110
Statistics														Statistics														Statistics
Number of comparisons per family	6													Number of families	1													Number of families	1
Alpha	0.05													Number of comparisons per family	6													Number of comparisons per family	6
														Alpha	0.05													Alpha	0.05
Tukey's multiple comparisons test	Predicted (LS) mean diff,	95,00% CI of diff,	Below threshold?	Summary	Adjusted P Value
														Tukey's multiple comparisons test	Mean Diff,	95,00% CI of diff,	Below threshold?	Summary	Adjusted P Value									Tukey's multiple comparisons test	Mean Diff,	95,00% CI of diff,	Below threshold?	Summary	Adjusted P Value
P20:WT vs. P20:cKO	0.05867	-0,07214 to 0,1895	No	ns	0.586									P20 WT vs. P20 KO	0.04579	-0,05360 to 0,1452	No	ns	0.5653	A-B								P20 WT vs. P20 KO	-0.0737	-0,3420 to 0,1946	No	ns	0.8598	A-B
P20:WT vs. P60:WT	-0.1722	-0,2955 to -0,04885	Yes	**	0.0052									P20 WT vs. P60 WT	-0.155	-0,2487 to -0,06127	Yes	**	0.0012	A-C								P20 WT vs. P60 WT	-0.5564	-0,8093 to -0,3034	Yes	****	<0,0001	A-C
P20:WT vs. P60:cKO	0.171	0,05294 to 0,2891	Yes	**	0.0038									P20 WT vs. P60 KO	0.02606	-0,06366 to 0,1158	No	ns	0.839	A-D								P20 WT vs. P60 KO	0.1985	-0,04366 to 0,4407	No	ns	0.1291	A-D
P20:cKO vs. P60:WT	-0.2309	-0,3617 to -0,1000	Yes	***	0.0006									P20 KO vs. P60 WT	-0.2008	-0,3002 to -0,1014	Yes	***	0.0002	B-C								P20 KO vs. P60 WT	-0.4827	-0,7510 to -0,2144	Yes	***	0.0005	B-C
P20:cKO vs. P60:cKO	0.1124	-0,01352 to 0,2382	No	ns	0.089									P20 KO vs. P60 KO	-0.01973	-0,1154 to 0,07591	No	ns	0.9336	B-D								P20 KO vs. P60 KO	0.2722	0,01405 to 0,5304	Yes	*	0.037	B-D
P60:WT vs. P60:cKO	0.3432	0,2251 to 0,4613	Yes	****	<0,0001									P60 WT vs. P60 KO	0.181	0,09132 to 0,2708	Yes	***	0.0002	C-D								P60 WT vs. P60 KO	0.7549	0,5127 to 0,9971	Yes	****	<0,0001	C-D
														Test details	Mean 1	Mean 2	Mean Diff,	SE of diff,	n1	n2	q	DF						Test details	Mean 1	Mean 2	Mean Diff,	SE of diff,	n1	n2	q	DF
Test details	Predicted (LS) mean 1	Predicted (LS) mean 2	Predicted (LS) mean diff,	SE of diff,	N1	N2	q	DF						P20 WT vs. P20 KO	0.2423	0.1966	0.04579	0.03474	5	4	1.864	16						P20 WT vs. P20 KO	0.6238	0.6975	-0.0737	0.09378	5	4	1.111	16
														P20 WT vs. P60 WT	0.2423	0.3973	-0.155	0.03275	5	5	6.692	16						P20 WT vs. P60 WT	0.6238	1.18	-0.5564	0.08842	5	5	8.899	16
P20:WT vs. P20:cKO	0.4418	0.3832	0.05867	0.04572	5	4	1.815	16						P20 WT vs. P60 KO	0.2423	0.2163	0.02606	0.03136	5	6	1.175	16						P20 WT vs. P60 KO	0.6238	0.4253	0.1985	0.08465	5	6	3.317	16
P20:WT vs. P60:WT	0.4418	0.614	-0.1722	0.04311	5	5	5.649	16						P20 KO vs. P60 WT	0.1966	0.3973	-0.2008	0.03474	4	5	8.173	16						P20 KO vs. P60 WT	0.6975	1.18	-0.4827	0.09378	4	5	7.278	16
P20:WT vs. P60:cKO	0.4418	0.2708	0.171	0.04127	5	6	5.86	16						P20 KO vs. P60 KO	0.1966	0.2163	-0.01973	0.03343	4	6	0.8348	16						P20 KO vs. P60 KO	0.6975	0.4253	0.2722	0.09024	4	6	4.266	16
P20:cKO vs. P60:WT	0.3832	0.614	-0.2309	0.04572	4	5	7.14	16						P60 WT vs. P60 KO	0.3973	0.2163	0.181	0.03136	5	6	8.164	16						P60 WT vs. P60 KO	1.18	0.4253	0.7549	0.08465	5	6	12.61	16
P20:cKO vs. P60:cKO	0.3832	0.2708	0.1124	0.044	4	6	3.611	16
P60:WT vs. P60:cKO	0.614	0.2708	0.3432	0.04127	5	6	11.76	16
