# Supplementary material for: Ephrin-B1 regulates the adult diastolic function through a late postnatal maturation of cardiomyocyte surface crests
Source: eLife. 2023 Jan 17;12:e80904. doi: 10.7554/eLife.80904 (PMC9844986; doi:10.7554/eLife.80904)
Supplement: Figure 5—source data 6. [file elife-80904-fig5-data6.xlsx]

## Sheet: Feuil1
Figure 5F
Sarcomere height (µm)
P20 WT	P20 KO	P60 WT	P60 KO
0.3484	0.286	0.417	0.3537
0.3267	0.3755	0.4802	0.342
0.3335	0.3559	0.4406	0.3484
0.2998	0.3398	0.4208	0.3442
		0.6244	0.3713
			0.3634
Statistics
Number of families	1
Number of comparisons per family	6
Alpha	0.05
Tukey's multiple comparisons test	Mean Diff,	95,00% CI of diff,	Below threshold?	Summary	Adjusted P Value
P20 WT vs. P20 cKO	-0.0122	-0,1122 to 0,08784	No	ns	0.9845	A-B
P20 WT vs. P60 WT	-0.1495	-0,2444 to -0,05459	Yes	**	0.002	A-C
P20 WT vs. P60 cKO	-0.02673	-0,1181 to 0,06459	No	ns	0.8329	A-D
P20 cKO vs. P60 WT	-0.1373	-0,2322 to -0,04239	Yes	**	0.0041	B-C
P20 cKO vs. P60 cKO	-0.01453	-0,1059 to 0,07679	No	ns	0.9669	B-D
P60 WT vs. P60 cKO	0.1228	0,03710 to 0,2084	Yes	**	0.0044	C-D
Test details	Mean 1	Mean 2	Mean Diff,	SE of diff,	n1	n2	q	DF
P20 WT vs. P20 cKO	0.3271	0.3393	-0.0122	0.03471	4	4	0.4971	15
P20 WT vs. P60 WT	0.3271	0.4766	-0.1495	0.03293	4	5	6.42	15
P20 WT vs. P60 cKO	0.3271	0.3538	-0.02673	0.03169	4	6	1.193	15
P20 cKO vs. P60 WT	0.3393	0.4766	-0.1373	0.03293	4	5	5.897	15
P20 cKO vs. P60 cKO	0.3393	0.3538	-0.01453	0.03169	4	6	0.6486	15
P60 WT vs. P60 cKO	0.4766	0.3538	0.1228	0.02972	5	6	5.841	15
