# Supplementary material for: Ephrin-B1 regulates the adult diastolic function through a late postnatal maturation of cardiomyocyte surface crests
Source: eLife. 2023 Jan 17;12:e80904. doi: 10.7554/eLife.80904 (PMC9844986; doi:10.7554/eLife.80904)
Supplement: Figure 5—source data 7. [file elife-80904-fig5-data7.xlsx]

## Sheet: Feuil1
Figure 5G
WT								KO
Lateral inter-space (nm)								Lateral inter-space (nm)
P20			P60					P20			P60
204			190	117				127	201	209	276	302	177
172			82	127				169	565	738	159	420	170
261			124	144				261	891	266	203	194	162
203			131	299				171	627	211	319	151	146
158			193	77				193	390	217	170	478	269
178			235	105				73	155	228	154	245	186
112			358	120				345	274	259	213	236	311
221			232	91				292	182	142	293	250	223
343			156	130				343	454	404	153	203	181
339			122	105				282	401	352	273	217	189
376			217	101				279	233	237	108	205	259
507			324	135				325	265	375	535	369	119
230			177	152				268	124	216	432	264	103
150			188	176				146	146	281	160	341	122
403			243	96				169	244	269	258	283	148
373			208	80				197	238	225	248	194	173
478			122	88				227	266	686	251	297	154
162			118	367				230	357	206	201	279	146
144			118	267				172	226	221	164	269	129
110			188	160				65	125	266	111	179	213
227			112	211				51	115	266	314	203	282
393			138	160				114	341	156	162	256	462
113			225	142				127	171	407	359	274	493
223			135	140				116	203	319	219	250	146
134			161	160				120	128	252	353	250	272
269			115	159				101	76	230	157	340	263
156			149	165				200	208	159	227	453	281
166			104	220				96	136	184	158	170	156
456			149					173	87	410	128	146	224
226			107					84	138	297	93	232	241
365			134					128	150	513	127	132	189
315			147					132	401	379	382	95	120
156								146	350	185		165	201
88								177	292	648		340	357
177								135	323	562		209	124
166								79	396	445		194	291
255								128	138	532		136	209
140								132	142	248		184	351
155								189	321	395		293	248
155								321	410			185	371
197								170	141			133	257
219								208	160			209	107
147								221	156			73	299
89								92	176			231	225
286								156	129			179	197
176								91	231			184	110
								155	148				116
								116					167
No Statistics								111					255
								200					95
								131					257
								139					159
								171					242
								199					167
													170
													269
													168
													394
													321
								No Statistics
