# Supplementary material for: Ephrin-B1 regulates the adult diastolic function through a late postnatal maturation of cardiomyocyte surface crests
Source: eLife. 2023 Jan 17;12:e80904. doi: 10.7554/eLife.80904 (PMC9844986; doi:10.7554/eLife.80904)
Supplement: Figure 6—source data 1. [file elife-80904-fig6-data1.xlsx]

## Sheet: Figure 6A
Figure 6A
Heart rate (bpm)				LVEF (%)				LVPWd (mm)				LVIDd (mm)				LVEDV (µL)				IVRT (ms)				LA/Ao				MV E/A				MV E/E'				LV-GLS (%)
WT	KO			WT	KO			WT	KO			WT	KO			WT	KO			WT	KO			WT	KO			WT	cKO			WT	KO			WT	KO
503.125	569.871			56.0494	55.6116			0.853	0.625862			3.831	4.29569			74.5091	77.3316			10.8333	12.8333			0.843931	1.23171			1.12314				2.19968	1.61579			-20.804	-14.037
484.907	541.746			58.4321	59.3527			0.785	0.758621			3.94203	4.24828			72.9688	84.3			9.72222	13.8889			0.893617	0.973333			1.15257	1.27027			1.82024	3.40772			-22.832	-14.896
491.776	495.051			55.2517	57.3545			0.797	0.644828			4.059	4.116			74.6047	72.3203			12.9167	16.25			0.932584	1.56452			1.23366	1.14653			3.33556	3.00473			-28.946	-19.549
450.711	462.874			56.967	58.2973			0.853	0.74			4.116	4.32414			72.1264	78.0922			12.5	18.8889			1.03571	1.34286			1.28929	0.923687			4.10274	4.68206			-20.136	-14.476
543.371	459.435			57.3196	57.4196			0.778	0.749138			3.96724	4.39052			61.1158	80.6143			12.9167	18.3333			0.960527	1.13333			1.17194	0.994953			3.29285	4.95006			-20.622	-12.715
473.891	450.124			64.8021	55.1174			0.79	0.739655			3.816	4.44741			63.5247	80.4301			16.1111	17.2222			0.951807	1.1358			1.39366	1.14811			3.35869	4.02838			-23.688	-17.271
460.564	433.234			53.9124	54.9203			0.706	0.711207			3.97565	4.38621			75.4694	78.6535			14.5833	17.2222			0.852273	1.04938			1.24141	0.730525			3.86102	2.37506			-20.454	-15.342
480.674	442.968			57.1521	54.8215			0.859698				3.934				75.456				15	21.6667			1	1.30968			1.14965				3.95433	2.7774				-12.322
447.098				53.6011				0.74				4.153				70.0288				11.25				1.08236				1.23555				3.03091
Statistics				Statistics				Statistics				Statistics				Statistics				Statistics				Statistics				Statistics				Statistics				Statistics
Table Analyzed	Heart rate			Table Analyzed	LVEF, %			Table Analyzed	LVPW;d (mm)			Table Analyzed	LVID;d (mm)			Table Analyzed	LVEDV (µL)			Table Analyzed	IVRT, ms			Table Analyzed	Ao/LA			Table Analyzed	MV E/A			Table Analyzed	MV E/E'			Table Analyzed	LV-SLG
Column B	cKO			Column B	cKO			Column B	cKO			Column B	cKO			Column B	cKO			Column B	cKO			Column B	cKO			Column B	cKO			Column B	cKO			Column B	cKO
vs.	vs,			vs.	vs,			vs.	vs,			vs.	vs,			vs.	vs,			vs.	vs,			vs.	vs,			vs.	vs,			vs.	vs,			vs.	vs,
Column A	WT			Column A	WT			Column A	WT			Column A	WT			Column A	WT			Column A	WT			Column A	WT			Column A	WT			Column A	WT			Column A	WT
Unpaired t test				Unpaired t test				Unpaired t test				Unpaired t test				Unpaired t test				Unpaired t test				Unpaired t test				Unpaired t test				Unpaired t test				Unpaired t test
P value	0.9951			P value	0.7402			P value	0.0062			P value	<0,0001			P value	0.0054			P value	0.0032			P value	0.0014			P value	0.0234			P value	0.7732			P value	0.0002
P value summary	ns			P value summary	ns			P value summary	**			P value summary	****			P value summary	**			P value summary	**			P value summary	**			P value summary	*			P value summary	ns			P value summary	***
Significantly different (P < 0.05)?	No			Significantly different (P < 0.05)?	No			Significantly different (P < 0.05)?	Yes			Significantly different (P < 0.05)?	Yes			Significantly different (P < 0.05)?	Yes			Significantly different (P < 0.05)?	Yes			Significantly different (P < 0.05)?	Yes			Significantly different (P < 0.05)?	Yes			Significantly different (P < 0.05)?	No			Significantly different (P < 0.05)?	Yes
One- or two-tailed P value?	Two-tailed			One- or two-tailed P value?	Two-tailed			One- or two-tailed P value?	Two-tailed			One- or two-tailed P value?	Two-tailed			One- or two-tailed P value?	Two-tailed			One- or two-tailed P value?	Two-tailed			One- or two-tailed P value?	Two-tailed			One- or two-tailed P value?	Two-tailed			One- or two-tailed P value?	Two-tailed			One- or two-tailed P value?	Two-tailed
t, df	t=0,006246, df=15			t, df	t=0,3378, df=15			t, df	t=3,216, df=14			t, df	t=5,917, df=14			t, df	t=3,284, df=14			t, df	t=3,509, df=15			t, df	t=3,901, df=15			t, df	t=2,568, df=13			t, df	t=0,2935, df=15			t, df	t=5,202, df=13
How big is the difference?				How big is the difference?				How big is the difference?				How big is the difference?				How big is the difference?				How big is the difference?				How big is the difference?				How big is the difference?				How big is the difference?				How big is the difference?
Mean of column A	481.8			Mean of column A	57.05			Mean of column A	0.7957			Mean of column A	3.977			Mean of column A	71.09			Mean of column A	12.87			Mean of column A	0.9503			Mean of column A	1.221			Mean of column A	3.217			Mean of column A	-22.5
Mean of column B	481.9			Mean of column B	56.61			Mean of column B	0.7099			Mean of column B	4.315			Mean of column B	78.82			Mean of column B	17.04			Mean of column B	1.218			Mean of column B	1.036			Mean of column B	3.355			Mean of column B	-15.08
Difference between means (B - A) ± SEM	0,1221 ± 19,56			Difference between means (B - A) ± SEM	-0,4423 ± 1,309			Difference between means (B - A) ± SEM	-0,08584 ± 0,02669			Difference between means (B - A) ± SEM	0,3384 ± 0,05718			Difference between means (B - A) ± SEM	7,731 ± 2,355			Difference between means (B - A) ± SEM	4,168 ± 1,188			Difference between means (B - A) ± SEM	0,2673 ± 0,06852			Difference between means (B - A) ± SEM	-0,1855 ± 0,07225			Difference between means (B - A) ± SEM	0,1378 ± 0,4695			Difference between means (B - A) ± SEM	7,421 ± 1,427
95% confidence interval	-41,56 to 41,80			95% confidence interval	-3,233 to 2,349			95% confidence interval	-0,1431 to -0,02859			95% confidence interval	0,2157 to 0,4610			95% confidence interval	2,681 to 12,78			95% confidence interval	1,636 to 6,699			95% confidence interval	0,1212 to 0,4133			95% confidence interval	-0,3416 to -0,02944			95% confidence interval	-0,8630 to 1,139			95% confidence interval	4,339 to 10,50
R squared (eta squared)	2.601e-06			R squared (eta squared)	0.007549			R squared (eta squared)	0.4249			R squared (eta squared)	0.7144			R squared (eta squared)	0.4351			R squared (eta squared)	0.4508			R squared (eta squared)	0.5036			R squared (eta squared)	0.3365			R squared (eta squared)	0.00571			R squared (eta squared)	0.6755
F test to compare variances				F test to compare variances				F test to compare variances				F test to compare variances				F test to compare variances				F test to compare variances				F test to compare variances				F test to compare variances				F test to compare variances				F test to compare variances
F, DFn, Dfd	2,801, 7, 8			F, DFn, Dfd	3,695, 8, 7			F, DFn, Dfd	1,018, 6, 8			F, DFn, Dfd	1,107, 8, 6			F, DFn, Dfd	2,084, 8, 6			F, DFn, Dfd	1,800, 7, 8			F, DFn, Dfd	5,442, 7, 8			F, DFn, Dfd	5,255, 5, 8			F, DFn, Dfd	2,190, 7, 8			F, DFn, Dfd	1,749, 6, 7
P value	0.1724			P value	0.102			P value	0.9526			P value	0.9279			P value	0.3864			P value	0.4278			P value	0.0294			P value	0.0393			P value	0.2944			P value	0.481
P value summary	ns			P value summary	ns			P value summary	ns			P value summary	ns			P value summary	ns			P value summary	ns			P value summary	*			P value summary	*			P value summary	ns			P value summary	ns
Significantly different (P < 0.05)?	No			Significantly different (P < 0.05)?	No			Significantly different (P < 0.05)?	No			Significantly different (P < 0.05)?	No			Significantly different (P < 0.05)?	No			Significantly different (P < 0.05)?	No			Significantly different (P < 0.05)?	Yes			Significantly different (P < 0.05)?	Yes			Significantly different (P < 0.05)?	No			Significantly different (P < 0.05)?	No
Data analyzed				Data analyzed				Data analyzed				Data analyzed				Data analyzed				Data analyzed				Data analyzed				Data analyzed				Data analyzed				Data analyzed
Sample size, column A	9			Sample size, column A	9			Sample size, column A	9			Sample size, column A	9			Sample size, column A	9			Sample size, column A	9			Sample size, column A	9			Sample size, column A	9			Sample size, column A	9			Sample size, column A	7
Sample size, column B	8			Sample size, column B	8			Sample size, column B	7			Sample size, column B	7			Sample size, column B	7			Sample size, column B	8			Sample size, column B	8			Sample size, column B	6			Sample size, column B	8			Sample size, column B	8

## Sheet: Figure 6B
Figure 6B
Heart rate (bpm)				EDP (mmHg)				Min dP/dt (mmHg/s)				Tau (ms)
WT	KO			WT	KO			WT	KO			WT	KO
351.779	406.922			4.11039	8.11623			-4984.62	-5087.13			0.0169204	0.0160628
356.056	456.37			5.14779	8.17465			-4721.55	-3965.58			0.0168367	0.0211781
445.643	476.883			5.57464	8.94056			-4116.87	-4950.81			0.0209396	0.0169876
437.602	393.573			6.52454	10.345			-4348.58	-2910.8			0.0181235	0.0277106
407.997	483.506			4.6666	6.93208			-4211.36	-4707.35			0.0188035	0.016238
458.449	329.381			8.42916	10.5208			-4707.73	-4437.14			0.0175751	0.0176446
408.577	437.588			6.26283	9.42581			-4496.51	-5563.54			0.0176497	0.0166151
304.616	509.915				7.19595			-4503.29	-4464.55			0.0169814	0.0195088
448.9	439.675				8.11913			-4628.04	-4484.7			0.0200352	0.0183694
484.571	371.58				8.2327			-4770.74	-4334.96			0.0195044	0.0176568
461.727	432.034							-4713.72	-5384.66			0.0166147	0.016624
404.113	422.461								-4632.22				0.0185569
	467.883								-5026.62
	473.904			Statistics
	489.173			Table Analyzed	EDP
				Column B	cKO			Statistics
Statistics				vs.	vs,			Table Analyzed	Min dP/dt			Statistics
Table Analyzed	Heart Rate			Column A	WT							Table Analyzed	Tau
								Column B	cKO
Column B	cKO			Unpaired t test				vs.	vs,			Column B	cKO
vs.	vs,			P value	0.0002			Column A	WT			vs.	vs,
Column A	WT			P value summary	***							Column A	WT
				Significantly different (P < 0.05)?	Yes			Unpaired t test
Unpaired t test				One- or two-tailed P value?	Two-tailed			P value	0.828			Unpaired t test
P value	0.2121			t, df	t=4,406, df=23			P value summary	ns			P value	0.6994
P value summary	ns							Significantly different (P < 0.05)?	No			P value summary	ns
Significantly different (P < 0.05)?	No			How big is the difference?				One- or two-tailed P value?	Two-tailed			Significantly different (P < 0.05)?	No
One- or two-tailed P value?	Two-tailed			Mean of column A	5.651			t, df	t=0,2199, df=22			One- or two-tailed P value?	Two-tailed
t, df	t=1,280, df=25			Mean of column B	8.555							t, df	t=0,3914, df=21
				Difference between means (B - A) ± SEM	2,904 ± 0,6592			How big is the difference?
How big is the difference?				95% confidence interval	1,540 to 4,268			Mean of column A	-4564			How big is the difference?
Mean of column A	414.2			R squared (eta squared)	0.4577			Mean of column B	-4612			Mean of column A	0.01818
Mean of column B	439.4							Difference between means (B - A) ± SEM	-47,63 ± 216,6			Mean of column B	0.0186
Difference between means (B - A) ± SEM	25,22 ± 19,70			F test to compare variances				95% confidence interval	-496,9 to 401,7			Difference between means (B - A) ± SEM	0,0004157 ± 0,001062
95% confidence interval	-15,35 to 65,79			F, DFn, Dfd	1,778, 13, 10			R squared (eta squared)	0.002193			95% confidence interval	-0,001793 to 0,002624
R squared (eta squared)	0.06155			P value	0.3665							R squared (eta squared)	0.007243
				P value summary	ns			F test to compare variances
F test to compare variances				Significantly different (P < 0.05)?	No			F, DFn, Dfd	6,812, 12, 10			F test to compare variances
F, DFn, Dfd	1,199, 11, 14							P value	0.0048			F, DFn, Dfd	4,939, 11, 10
P value	0.7367			Data analyzed				P value summary	**			P value	0.0176
P value summary	ns			Sample size, column A	11			Significantly different (P < 0.05)?	Yes			P value summary	*
Significantly different (P < 0.05)?	No			Sample size, column B	14							Significantly different (P < 0.05)?	Yes
								Data analyzed
Data analyzed								Sample size, column A	11			Data analyzed
Sample size, column A	12							Sample size, column B	13			Sample size, column A	11
Sample size, column B	15											Sample size, column B	12

## Sheet: Figure 6C
Figure 6C
	Sarcomere length (µm)					Basal SL (µm)				SL shortening (% SLo)				SL shortening velocity (µm.s-1)				SL relaxation velocity (µm.s-1)
WT		cKO				WT	cKO			WT	cKO			WT	cKO			WT	cKO
Time 0	sarc.Sarc Const	Time 0	sarc.Sarc Const			1.74	1.73			7.34	3.85			-3.48	-2.06			1.66	0.95
0	1.753	0	1.713			1.76	1.72			6.61	6.2			-4.08	-2.65			2.26	1.58
0.004	1.754	0.008	1.713			1.76	1.69			8.33	4.46			-3.77	-1.97			2.3	0.92
0.008	1.753	0.017	1.713			1.77	1.74			10.15	6.57			-4.69	-3.31			2.59	2.23
0.012	1.753	0.025	1.713			1.77	1.73			11.02	6.22			-5.48	-2.33			3.03	1.54
0.016	1.754	0.033	1.713				1.74				5.91				-3.16				1.63
0.02	1.754	0.042	1.713								5.67				-2.18				1
0.024	1.754	0.05	1.713
0.028	1.753	0.058	1.713			Statistics
0.032	1.754	0.066	1.713			Table Analyzed				Statistics				Statistics				Statistics
0.036	1.753	0.075	1.714				Basal SL			Table Analyzed	SL shortening			Table Analyzed	SL shortening velocity			Table Analyzed	SL relaxation velocity
0.04	1.754	0.083	1.713			Column B
0.044	1.754	0.091	1.713			vs.	cKO			Column B	cKO			Column B	cKO			Column B	cKO
0.048	1.753	0.1	1.709			Column A	vs,			vs.	vs,			vs.	vs,			vs.	vs,
0.052	1.754	0.108	1.691				WT			Column A	WT			Column A	WT			Column A	WT
0.056	1.753	0.116	1.672			Unpaired t test
0.06	1.754	0.125	1.658			P value				Mann Whitney test				Unpaired t test				Mann Whitney test
0.064	1.754	0.133	1.647			P value summary	0.006			P value	0.0025			P value	0.0009			P value	0.0051
0.068	1.753	0.141	1.638			Significantly different (P < 0.05)?	**			Exact or approximate P value?	Exact			P value summary	***			Exact or approximate P value?	Exact
0.072	1.754	0.15	1.633			One- or two-tailed P value?	Yes			P value summary	**			Significantly different (P < 0.05)?	Yes			P value summary	**
0.076	1.753	0.158	1.629			t, df	Two-tailed			Significantly different (P < 0.05)?	Yes			One- or two-tailed P value?	Two-tailed			Significantly different (P < 0.05)?	Yes
0.08	1.753	0.166	1.626				t=3,577, df=9			One- or two-tailed P value?	Two-tailed			t, df	t=4,649, df=10			One- or two-tailed P value?	Two-tailed
0.084	1.754	0.175	1.625			How big is the difference?				Sum of ranks in column A,B	50 , 28							Sum of ranks in column A,B	49 , 29
0.088	1.753	0.183	1.625			Mean of column A				Mann-Whitney U	0			How big is the difference?				Mann-Whitney U	1
0.092	1.754	0.191	1.624			Mean of column B	1.76							Mean of column A	-4.3
0.096	1.753	0.199	1.625			Difference between means (B - A) ± SEM	1.725			Difference between medians				Mean of column B	-2.523			Difference between medians
0.1	1.754	0.208	1.626			95% confidence interval	-0,03500 ± 0,009785			Median of column A	8,330, n=5			Difference between means (B - A) ± SEM	1,777 ± 0,3823			Median of column A	2,300, n=5
0.104	1.751	0.216	1.628			R squared (eta squared)	-0,05713 to -0,01287			Median of column B	5,910, n=7			95% confidence interval	0,9254 to 2,629			Median of column B	1,540, n=7
0.108	1.744	0.225	1.63				0.5871			Difference: Actual	-2.42			R squared (eta squared)	0.6836			Difference: Actual	-0.76
0.112	1.732	0.233	1.633			F test to compare variances				Difference: Hodges-Lehmann	-2.88							Difference: Hodges-Lehmann	-0.96
0.116	1.716	0.241	1.637			F, DFn, Dfd								F test to compare variances
0.12	1.701	0.249	1.644			P value	2,333, 5, 4							F, DFn, Dfd	2,225, 4, 6
0.124	1.69	0.258	1.651			P value summary	0.432							P value	0.3645
0.128	1.679	0.266	1.656			Significantly different (P < 0.05)?	ns							P value summary	ns
0.132	1.669	0.274	1.661				No							Significantly different (P < 0.05)?	No
0.136	1.657	0.283	1.664			Data analyzed
0.14	1.649	0.291	1.668			Sample size, column A								Data analyzed
0.144	1.641	0.299	1.673			Sample size, column B	5							Sample size, column A	5
0.148	1.636	0.308	1.678				6							Sample size, column B	7
0.152	1.628	0.316	1.681
0.156	1.622	0.324	1.683
0.16	1.618	0.333	1.684
0.164	1.615	0.341	1.685
0.168	1.609	0.349	1.686
0.172	1.605	0.358	1.687
0.176	1.602	0.366	1.688
0.18	1.599	0.374	1.689
0.184	1.597	0.383	1.689
0.188	1.594	0.391	1.69
0.192	1.591	0.399	1.691
0.196	1.59	0.407	1.691
0.2	1.588	0.416	1.692
0.204	1.588	0.424	1.692
0.208	1.586	0.432	1.693
0.212	1.586	0.441	1.694
0.216	1.586	0.449	1.694
0.22	1.585	0.457	1.694
0.224	1.586	0.466	1.695
0.228	1.585	0.474	1.696
0.232	1.586	0.482	1.696
0.236	1.588	0.491	1.696
0.24	1.589	0.499	1.698
0.244	1.591	0.507	1.697
0.248	1.593	0.516	1.698
0.252	1.596	0.524	1.699
0.256	1.599	0.532	1.699
0.26	1.601	0.541	1.7
0.264	1.606	0.549	1.7
0.268	1.612	0.557	1.701
0.272	1.617	0.566	1.7
0.276	1.622	0.574	1.702
0.28	1.63	0.582	1.702
0.284	1.637	0.59	1.702
0.288	1.645	0.599	1.703
0.292	1.653	0.607	1.703
0.296	1.662	0.615	1.704
0.3	1.67	0.624	1.704
0.304	1.678	0.632	1.704
0.308	1.686	0.64	1.705
0.312	1.694	0.649	1.705
0.316	1.702	0.657	1.705
0.32	1.708	0.665	1.706
0.324	1.712	0.674	1.706
0.328	1.715	0.682	1.706
0.332	1.718	0.69	1.707
0.336	1.72	0.699	1.707
0.34	1.723	0.707	1.707
0.344	1.725	0.715	1.708
0.348	1.727	0.724	1.708
0.352	1.729	0.732	1.708
0.356	1.73	0.74	1.709
0.36	1.731	0.748	1.709
0.364	1.732	0.757	1.709
0.368	1.732	0.765	1.709
0.372	1.734	0.773	1.709
0.376	1.735	0.782	1.709
0.38	1.735	0.79	1.709
0.384	1.735	0.798	1.709
0.388	1.737	0.807	1.71
0.392	1.737	0.815	1.71
0.396	1.737	0.823	1.71
0.4	1.738	0.832	1.71
0.404	1.737	0.84	1.711
0.408	1.738	0.848	1.71
0.412	1.74	0.857	1.711
0.416	1.739	0.865	1.711
0.42	1.739	0.873	1.711
0.424	1.739	0.882	1.711
0.428	1.74	0.89	1.711
0.432	1.741	0.898	1.711
0.436	1.74	0.906	1.712
0.44	1.742	0.915	1.711
0.444	1.741	0.923	1.712
0.448	1.742	0.931	1.712
0.452	1.742	0.94	1.712
0.456	1.742	0.948	1.712
0.46	1.742
0.464	1.743
0.468	1.744
0.472	1.744
0.476	1.745
0.48	1.744
0.484	1.745
0.488	1.745
0.492	1.746
0.496	1.747
0.5	1.746
0.504	1.746
0.508	1.745
0.512	1.747
0.516	1.747
0.52	1.747
0.524	1.747
0.528	1.748
0.532	1.747
0.536	1.747
0.54	1.747
0.544	1.748
0.548	1.748
0.552	1.748
0.556	1.748
0.56	1.748
0.564	1.749
0.568	1.749
0.572	1.749
0.576	1.748
0.58	1.748
0.584	1.749
0.588	1.749
0.592	1.749
0.596	1.749
0.6	1.75
0.604	1.749
0.608	1.75
0.612	1.75
0.616	1.75
0.62	1.75
0.624	1.749
0.628	1.75
0.632	1.75
0.636	1.75
0.64	1.75
0.644	1.75
0.648	1.75
0.652	1.75
0.656	1.75
0.66	1.751
0.664	1.751
0.668	1.751
0.672	1.751
0.676	1.751
0.68	1.75
0.684	1.751
0.688	1.751
0.692	1.751
0.696	1.751
0.7	1.751
0.704	1.751
0.708	1.751
0.712	1.752
0.716	1.752
0.72	1.752
0.724	1.752
0.728	1.751
0.732	1.751
0.736	1.752
0.74	1.752
0.744	1.751
0.748	1.752
0.752	1.751
0.756	1.751
0.76	1.752
0.764	1.751
0.768	1.752
0.772	1.752
0.776	1.752
0.78	1.752
0.784	1.752
0.788	1.752
0.792	1.752
0.796	1.752
0.8	1.752
0.804	1.752
0.808	1.752
0.812	1.752
0.816	1.753
0.82	1.752
0.824	1.752
0.828	1.753
0.832	1.752
0.836	1.752
0.84	1.753
0.844	1.753
0.848	1.753
0.852	1.753
0.856	1.752
0.86	1.753
0.864	1.752
0.868	1.752
0.872	1.753
0.876	1.753
0.88	1.753
0.884	1.753
0.888	1.753
0.892	1.752
0.896	1.753
0.9	1.753
0.904	1.753
0.908	1.753
0.912	1.753
0.916	1.753
0.92	1.753
0.924	1.753
0.928	1.753
0.932	1.753
0.936	1.753
0.94	1.753
0.944	1.753
0.948	1.754

## Sheet: Figure 6D
Figure 6D
VO2 max (ml/h/kg)
4 Month WT	4 Month KO
2928	3070
2960	2318
3365	2704
3470	3230
3351	2134
3262	2532
2842	2935
	2888
Statistics
Table Analyzed	VO2
Column C	4 Month cKO
vs.	vs,
Column B	4 Month WT
Unpaired t test
P value	0.021
P value summary	*
Significantly different (P < 0.05)?	Yes
One- or two-tailed P value?	Two-tailed
t, df	t=2,624, df=13
How big is the difference?
Mean of column B	3168
Mean of column C	2726
Difference between means (C - B) ± SEM	-441,9 ± 168,4
95% confidence interval	-805,8 to -78,04
R squared (eta squared)	0.3462
F test to compare variances
F, DFn, Dfd	2,253, 7, 6
P value	0.3418
P value summary	ns
Significantly different (P < 0.05)?	No
Data analyzed
Sample size, column B	7
Sample size, column C	8
