# Supplementary material for: Ephrin-B1 regulates the adult diastolic function through a late postnatal maturation of cardiomyocyte surface crests
Source: eLife. 2023 Jan 17;12:e80904. doi: 10.7554/eLife.80904 (PMC9844986; doi:10.7554/eLife.80904)
Supplement: Figure 6—source data 2. [file elife-80904-fig6-data2.xlsx]

## Sheet: Feuil1
Figure 6B
Heart rate (bpm)				EDP (mmHg)				Min dP/dt (mmHg/s)				Tau (ms)
WT	KO			WT	KO			WT	KO			WT	KO
351.779	406.922			4.11039	8.11623			-4984.62	-5087.13			0.0169204	0.0160628
356.056	456.37			5.14779	8.17465			-4721.55	-3965.58			0.0168367	0.0211781
445.643	476.883			5.57464	8.94056			-4116.87	-4950.81			0.0209396	0.0169876
437.602	393.573			6.52454	10.345			-4348.58	-2910.8			0.0181235	0.0277106
407.997	483.506			4.6666	6.93208			-4211.36	-4707.35			0.0188035	0.016238
458.449	329.381			8.42916	10.5208			-4707.73	-4437.14			0.0175751	0.0176446
408.577	437.588			6.26283	9.42581			-4496.51	-5563.54			0.0176497	0.0166151
304.616	509.915				7.19595			-4503.29	-4464.55			0.0169814	0.0195088
448.9	439.675				8.11913			-4628.04	-4484.7			0.0200352	0.0183694
484.571	371.58				8.2327			-4770.74	-4334.96			0.0195044	0.0176568
461.727	432.034							-4713.72	-5384.66			0.0166147	0.016624
404.113	422.461								-4632.22				0.0185569
	467.883								-5026.62
	473.904			Statistics
	489.173			Table Analyzed	EDP
				Column B	cKO			Statistics
Statistics				vs.	vs,			Table Analyzed	Min dP/dt			Statistics
Table Analyzed	Heart Rate			Column A	WT							Table Analyzed	Tau
								Column B	cKO
Column B	cKO			Unpaired t test				vs.	vs,			Column B	cKO
vs.	vs,			P value	0.0002			Column A	WT			vs.	vs,
Column A	WT			P value summary	***							Column A	WT
				Significantly different (P < 0.05)?	Yes			Unpaired t test
Unpaired t test				One- or two-tailed P value?	Two-tailed			P value	0.828			Unpaired t test
P value	0.2121			t, df	t=4,406, df=23			P value summary	ns			P value	0.6994
P value summary	ns							Significantly different (P < 0.05)?	No			P value summary	ns
Significantly different (P < 0.05)?	No			How big is the difference?				One- or two-tailed P value?	Two-tailed			Significantly different (P < 0.05)?	No
One- or two-tailed P value?	Two-tailed			Mean of column A	5.651			t, df	t=0,2199, df=22			One- or two-tailed P value?	Two-tailed
t, df	t=1,280, df=25			Mean of column B	8.555							t, df	t=0,3914, df=21
				Difference between means (B - A) ± SEM	2,904 ± 0,6592			How big is the difference?
How big is the difference?				95% confidence interval	1,540 to 4,268			Mean of column A	-4564			How big is the difference?
Mean of column A	414.2			R squared (eta squared)	0.4577			Mean of column B	-4612			Mean of column A	0.01818
Mean of column B	439.4							Difference between means (B - A) ± SEM	-47,63 ± 216,6			Mean of column B	0.0186
Difference between means (B - A) ± SEM	25,22 ± 19,70			F test to compare variances				95% confidence interval	-496,9 to 401,7			Difference between means (B - A) ± SEM	0,0004157 ± 0,001062
95% confidence interval	-15,35 to 65,79			F, DFn, Dfd	1,778, 13, 10			R squared (eta squared)	0.002193			95% confidence interval	-0,001793 to 0,002624
R squared (eta squared)	0.06155			P value	0.3665							R squared (eta squared)	0.007243
				P value summary	ns			F test to compare variances
F test to compare variances				Significantly different (P < 0.05)?	No			F, DFn, Dfd	6,812, 12, 10			F test to compare variances
F, DFn, Dfd	1,199, 11, 14							P value	0.0048			F, DFn, Dfd	4,939, 11, 10
P value	0.7367			Data analyzed				P value summary	**			P value	0.0176
P value summary	ns			Sample size, column A	11			Significantly different (P < 0.05)?	Yes			P value summary	*
Significantly different (P < 0.05)?	No			Sample size, column B	14							Significantly different (P < 0.05)?	Yes
								Data analyzed
Data analyzed								Sample size, column A	11			Data analyzed
Sample size, column A	12							Sample size, column B	13			Sample size, column A	11
Sample size, column B	15											Sample size, column B	12
