# Supplementary material for: Ephrin-B1 regulates the adult diastolic function through a late postnatal maturation of cardiomyocyte surface crests
Source: eLife. 2023 Jan 17;12:e80904. doi: 10.7554/eLife.80904 (PMC9844986; doi:10.7554/eLife.80904)
Supplement: Figure 6—source data 3. [file elife-80904-fig6-data3.xlsx]

## Sheet: Feuil1
Figure 6C
	Sarcomere length (µm)					Basal SL (µm)				SL shortening (% SLo)				SL shortening velocity (µm.s-1)				SL relaxation velocity (µm.s-1)
WT		cKO				WT	cKO			WT	cKO			WT	cKO			WT	cKO
Time 0	sarc.Sarc Const	Time 0	sarc.Sarc Const			1.74	1.73			7.34	3.85			-3.48	-2.06			1.66	0.95
0	1.753	0	1.713			1.76	1.72			6.61	6.2			-4.08	-2.65			2.26	1.58
0.004	1.754	0.008	1.713			1.76	1.69			8.33	4.46			-3.77	-1.97			2.3	0.92
0.008	1.753	0.017	1.713			1.77	1.74			10.15	6.57			-4.69	-3.31			2.59	2.23
0.012	1.753	0.025	1.713			1.77	1.73			11.02	6.22			-5.48	-2.33			3.03	1.54
0.016	1.754	0.033	1.713				1.74				5.91				-3.16				1.63
0.02	1.754	0.042	1.713								5.67				-2.18				1
0.024	1.754	0.05	1.713
0.028	1.753	0.058	1.713			Statistics
0.032	1.754	0.066	1.713			Table Analyzed				Statistics				Statistics				Statistics
0.036	1.753	0.075	1.714				Basal SL			Table Analyzed	SL shortening			Table Analyzed	SL shortening velocity			Table Analyzed	SL relaxation velocity
0.04	1.754	0.083	1.713			Column B
0.044	1.754	0.091	1.713			vs.	cKO			Column B	cKO			Column B	cKO			Column B	cKO
0.048	1.753	0.1	1.709			Column A	vs,			vs.	vs,			vs.	vs,			vs.	vs,
0.052	1.754	0.108	1.691				WT			Column A	WT			Column A	WT			Column A	WT
0.056	1.753	0.116	1.672			Unpaired t test
0.06	1.754	0.125	1.658			P value				Mann Whitney test				Unpaired t test				Mann Whitney test
0.064	1.754	0.133	1.647			P value summary	0.006			P value	0.0025			P value	0.0009			P value	0.0051
0.068	1.753	0.141	1.638			Significantly different (P < 0.05)?	**			Exact or approximate P value?	Exact			P value summary	***			Exact or approximate P value?	Exact
0.072	1.754	0.15	1.633			One- or two-tailed P value?	Yes			P value summary	**			Significantly different (P < 0.05)?	Yes			P value summary	**
0.076	1.753	0.158	1.629			t, df	Two-tailed			Significantly different (P < 0.05)?	Yes			One- or two-tailed P value?	Two-tailed			Significantly different (P < 0.05)?	Yes
0.08	1.753	0.166	1.626				t=3,577, df=9			One- or two-tailed P value?	Two-tailed			t, df	t=4,649, df=10			One- or two-tailed P value?	Two-tailed
0.084	1.754	0.175	1.625			How big is the difference?				Sum of ranks in column A,B	50 , 28							Sum of ranks in column A,B	49 , 29
0.088	1.753	0.183	1.625			Mean of column A				Mann-Whitney U	0			How big is the difference?				Mann-Whitney U	1
0.092	1.754	0.191	1.624			Mean of column B	1.76							Mean of column A	-4.3
0.096	1.753	0.199	1.625			Difference between means (B - A) ± SEM	1.725			Difference between medians				Mean of column B	-2.523			Difference between medians
0.1	1.754	0.208	1.626			95% confidence interval	-0,03500 ± 0,009785			Median of column A	8,330, n=5			Difference between means (B - A) ± SEM	1,777 ± 0,3823			Median of column A	2,300, n=5
0.104	1.751	0.216	1.628			R squared (eta squared)	-0,05713 to -0,01287			Median of column B	5,910, n=7			95% confidence interval	0,9254 to 2,629			Median of column B	1,540, n=7
0.108	1.744	0.225	1.63				0.5871			Difference: Actual	-2.42			R squared (eta squared)	0.6836			Difference: Actual	-0.76
0.112	1.732	0.233	1.633			F test to compare variances				Difference: Hodges-Lehmann	-2.88							Difference: Hodges-Lehmann	-0.96
0.116	1.716	0.241	1.637			F, DFn, Dfd								F test to compare variances
0.12	1.701	0.249	1.644			P value	2,333, 5, 4							F, DFn, Dfd	2,225, 4, 6
0.124	1.69	0.258	1.651			P value summary	0.432							P value	0.3645
0.128	1.679	0.266	1.656			Significantly different (P < 0.05)?	ns							P value summary	ns
0.132	1.669	0.274	1.661				No							Significantly different (P < 0.05)?	No
0.136	1.657	0.283	1.664			Data analyzed
0.14	1.649	0.291	1.668			Sample size, column A								Data analyzed
0.144	1.641	0.299	1.673			Sample size, column B	5							Sample size, column A	5
0.148	1.636	0.308	1.678				6							Sample size, column B	7
0.152	1.628	0.316	1.681
0.156	1.622	0.324	1.683
0.16	1.618	0.333	1.684
0.164	1.615	0.341	1.685
0.168	1.609	0.349	1.686
0.172	1.605	0.358	1.687
0.176	1.602	0.366	1.688
0.18	1.599	0.374	1.689
0.184	1.597	0.383	1.689
0.188	1.594	0.391	1.69
0.192	1.591	0.399	1.691
0.196	1.59	0.407	1.691
0.2	1.588	0.416	1.692
0.204	1.588	0.424	1.692
0.208	1.586	0.432	1.693
0.212	1.586	0.441	1.694
0.216	1.586	0.449	1.694
0.22	1.585	0.457	1.694
0.224	1.586	0.466	1.695
0.228	1.585	0.474	1.696
0.232	1.586	0.482	1.696
0.236	1.588	0.491	1.696
0.24	1.589	0.499	1.698
0.244	1.591	0.507	1.697
0.248	1.593	0.516	1.698
0.252	1.596	0.524	1.699
0.256	1.599	0.532	1.699
0.26	1.601	0.541	1.7
0.264	1.606	0.549	1.7
0.268	1.612	0.557	1.701
0.272	1.617	0.566	1.7
0.276	1.622	0.574	1.702
0.28	1.63	0.582	1.702
0.284	1.637	0.59	1.702
0.288	1.645	0.599	1.703
0.292	1.653	0.607	1.703
0.296	1.662	0.615	1.704
0.3	1.67	0.624	1.704
0.304	1.678	0.632	1.704
0.308	1.686	0.64	1.705
0.312	1.694	0.649	1.705
0.316	1.702	0.657	1.705
0.32	1.708	0.665	1.706
0.324	1.712	0.674	1.706
0.328	1.715	0.682	1.706
0.332	1.718	0.69	1.707
0.336	1.72	0.699	1.707
0.34	1.723	0.707	1.707
0.344	1.725	0.715	1.708
0.348	1.727	0.724	1.708
0.352	1.729	0.732	1.708
0.356	1.73	0.74	1.709
0.36	1.731	0.748	1.709
0.364	1.732	0.757	1.709
0.368	1.732	0.765	1.709
0.372	1.734	0.773	1.709
0.376	1.735	0.782	1.709
0.38	1.735	0.79	1.709
0.384	1.735	0.798	1.709
0.388	1.737	0.807	1.71
0.392	1.737	0.815	1.71
0.396	1.737	0.823	1.71
0.4	1.738	0.832	1.71
0.404	1.737	0.84	1.711
0.408	1.738	0.848	1.71
0.412	1.74	0.857	1.711
0.416	1.739	0.865	1.711
0.42	1.739	0.873	1.711
0.424	1.739	0.882	1.711
0.428	1.74	0.89	1.711
0.432	1.741	0.898	1.711
0.436	1.74	0.906	1.712
0.44	1.742	0.915	1.711
0.444	1.741	0.923	1.712
0.448	1.742	0.931	1.712
0.452	1.742	0.94	1.712
0.456	1.742	0.948	1.712
0.46	1.742
0.464	1.743
0.468	1.744
0.472	1.744
0.476	1.745
0.48	1.744
0.484	1.745
0.488	1.745
0.492	1.746
0.496	1.747
0.5	1.746
0.504	1.746
0.508	1.745
0.512	1.747
0.516	1.747
0.52	1.747
0.524	1.747
0.528	1.748
0.532	1.747
0.536	1.747
0.54	1.747
0.544	1.748
0.548	1.748
0.552	1.748
0.556	1.748
0.56	1.748
0.564	1.749
0.568	1.749
0.572	1.749
0.576	1.748
0.58	1.748
0.584	1.749
0.588	1.749
0.592	1.749
0.596	1.749
0.6	1.75
0.604	1.749
0.608	1.75
0.612	1.75
0.616	1.75
0.62	1.75
0.624	1.749
0.628	1.75
0.632	1.75
0.636	1.75
0.64	1.75
0.644	1.75
0.648	1.75
0.652	1.75
0.656	1.75
0.66	1.751
0.664	1.751
0.668	1.751
0.672	1.751
0.676	1.751
0.68	1.75
0.684	1.751
0.688	1.751
0.692	1.751
0.696	1.751
0.7	1.751
0.704	1.751
0.708	1.751
0.712	1.752
0.716	1.752
0.72	1.752
0.724	1.752
0.728	1.751
0.732	1.751
0.736	1.752
0.74	1.752
0.744	1.751
0.748	1.752
0.752	1.751
0.756	1.751
0.76	1.752
0.764	1.751
0.768	1.752
0.772	1.752
0.776	1.752
0.78	1.752
0.784	1.752
0.788	1.752
0.792	1.752
0.796	1.752
0.8	1.752
0.804	1.752
0.808	1.752
0.812	1.752
0.816	1.753
0.82	1.752
0.824	1.752
0.828	1.753
0.832	1.752
0.836	1.752
0.84	1.753
0.844	1.753
0.848	1.753
0.852	1.753
0.856	1.752
0.86	1.753
0.864	1.752
0.868	1.752
0.872	1.753
0.876	1.753
0.88	1.753
0.884	1.753
0.888	1.753
0.892	1.752
0.896	1.753
0.9	1.753
0.904	1.753
0.908	1.753
0.912	1.753
0.916	1.753
0.92	1.753
0.924	1.753
0.928	1.753
0.932	1.753
0.936	1.753
0.94	1.753
0.944	1.753
0.948	1.754
