# Supplementary material for: Ephrin-B1 regulates the adult diastolic function through a late postnatal maturation of cardiomyocyte surface crests
Source: eLife. 2023 Jan 17;12:e80904. doi: 10.7554/eLife.80904 (PMC9844986; doi:10.7554/eLife.80904)
Supplement: Figure 6—source data 4. [file elife-80904-fig6-data4.xlsx]

## Sheet: Feuil1
Figure 6D
VO2 max (ml/h/kg)
4 Month WT	4 Month KO
2928	3070
2960	2318
3365	2704
3470	3230
3351	2134
3262	2532
2842	2935
	2888
Statistics
Table Analyzed	VO2
Column C	4 Month cKO
vs.	vs,
Column B	4 Month WT
Unpaired t test
P value	0.021
P value summary	*
Significantly different (P < 0.05)?	Yes
One- or two-tailed P value?	Two-tailed
t, df	t=2,624, df=13
How big is the difference?
Mean of column B	3168
Mean of column C	2726
Difference between means (C - B) ± SEM	-441,9 ± 168,4
95% confidence interval	-805,8 to -78,04
R squared (eta squared)	0.3462
F test to compare variances
F, DFn, Dfd	2,253, 7, 6
P value	0.3418
P value summary	ns
Significantly different (P < 0.05)?	No
Data analyzed
Sample size, column B	7
Sample size, column C	8
