# Supplementary material for: Ephrin-B1 regulates the adult diastolic function through a late postnatal maturation of cardiomyocyte surface crests
Source: eLife. 2023 Jan 17;12:e80904. doi: 10.7554/eLife.80904 (PMC9844986; doi:10.7554/eLife.80904)
Supplement: Figure 7—figure supplement 1—source data 1. [file elife-80904-fig7-figsupp1-data1.xlsx]

## Sheet: Figure 7-figure supplement 1E
Figure 7-figure supplement 1E
Ephrin-B1 protein expression (arbitrary units)
Ctrl Day 30	cKO Day 30	Ctrl Day 45	cKO Day 45
1.81807	0.919483	1.89059	0.876355
1.29757	0.725499	1.92596	0.790135
1.57764	0.563095	1.62329	0.535745
		1.28282
Statistics
Ordinary one-way ANOVA
Multiple comparisons
Number of families	1
Number of comparisons per family	2
Alpha	0.05
Šídák's multiple comparisons test	Mean Diff,	95,00% CI of diff,	Below threshold?	Summary	Adjusted P Value
Ctrl Day 30 vs. cKO Day 30	0.8284	0,2990 to 1,358	Yes	**	0.0047	A-B
Ctrl Day 45 vs. cKO Day 45	0.9466	0,4514 to 1,442	Yes	**	0.0013	C-D
Test details	Mean 1	Mean 2	Mean Diff,	SE of diff,	n1	n2	t	DF
Ctrl Day 30 vs. cKO Day 30	1.564	0.736	0.8284	0.1978	3	3	4.189	9
Ctrl Day 45 vs. cKO Day 45	1.681	0.7341	0.9466	0.185	4	3	5.117	9
