# Supplementary material for: Ephrin-B1 regulates the adult diastolic function through a late postnatal maturation of cardiomyocyte surface crests
Source: eLife. 2023 Jan 17;12:e80904. doi: 10.7554/eLife.80904 (PMC9844986; doi:10.7554/eLife.80904)
Supplement: Figure 7—source data 1. [file elife-80904-fig7-data1.xlsx]

## Sheet: Feuil1
Figure 7B
Total or partial loss of crest						Crest heigth / sarcomere length					SSM number
	Yes	No				Ctrl	cKO				Ctrl	cKO
Ctrl	10	36				0.295	0.295				1.083	0.672
cKO	22	28				0.388	0.255				0.969	0.514
						0.447	0.214				0.914	0.467
							0.341					0.482
Statistics
Table Analyzed	Total or partial loss of crest					Statistics					Statistics
P value and statistical significance						Table Analyzed	Crest heigth / sarcomere length				Table Analyzed	SSM number per crest
Test	Fisher's exact test
P value	0.0299					Column B	cKO				Column B	cKO
P value summary	*					vs.	vs,				vs.	vs,
One- or two-sided	Two-sided					Column A	Ctrl				Column A	Ctrl
Statistically significant (P < 0.05)?	Yes
						Unpaired t test					Unpaired t test
Data analyzed	Yes	No	Total			P value	0.0959				P value	0.0013
Ctrl	10	36	46			P value summary	ns				P value summary	**
cKO	22	28	50			Significantly different (P < 0.05)?	No				Significantly different (P < 0.05)?	Yes
Total	32	64	96			One- or two-tailed P value?	Two-tailed				One- or two-tailed P value?	Two-tailed
						t, df	t=2,048, df=5				t, df	t=6,538, df=5
Percentage of row total	Yes	No
Ctrl	21,74%	78,26%				How big is the difference?					How big is the difference?
cKO	44,00%	56,00%				Mean of column A	0.3767				Mean of column A	0.9887
						Mean of column B	0.2763				Mean of column B	0.5338
Percentage of column total	Yes	No				Difference between means (B - A) ± SEM	-0,1004 ± 0,04904				Difference between means (B - A) ± SEM	-0,4549 ± 0,06958
Ctrl	31,25%	56,25%				95% confidence interval	-0,2265 to 0,02565				95% confidence interval	-0,6338 to -0,2761
cKO	68,75%	43,75%				R squared (eta squared)	0.4561				R squared (eta squared)	0.8953
Percentage of grand total	Yes	No				F test to compare variances					F test to compare variances
Ctrl	10,42%	37,50%				F, DFn, Dfd	1,986, 2, 3				F, DFn, Dfd	1,195, 3, 2
cKO	22,92%	29,17%				P value	0.5645				P value	0.9715
						P value summary	ns				P value summary	ns
						Significantly different (P < 0.05)?	No				Significantly different (P < 0.05)?	No
						Data analyzed					Data analyzed
						Sample size, column A	3				Sample size, column A	3
						Sample size, column B	4				Sample size, column B	4
