# Supplementary material for: Ephrin-B1 regulates the adult diastolic function through a late postnatal maturation of cardiomyocyte surface crests
Source: eLife. 2023 Jan 17;12:e80904. doi: 10.7554/eLife.80904 (PMC9844986; doi:10.7554/eLife.80904)
Supplement: Figure 7—source data 2. [file elife-80904-fig7-data2.xlsx]

## Sheet: Feuil1
Figure 7C
Heart rate (bpm)				LVEF (%)				LVPWd (mm)				LVIDd (mm)				LVEDV (µL)				IVRT (ms)				IVSd (mm)				MV E/A
																								Ctrl	Efnb1 cKO			Efnb1f/f	Efnb1ciKo
Ctrl	Efnb1 cKO			Ctrl	Efnb1 cKO			Ctrl	Efnb1 cKO			Ctrl	Efnb1 cKO			Ctrl	Efnb1 cKO			Ctrl	Efnb1 cKO			0.692241	0.768103				1.00519
556.974	549.018			52.2604	50.833			0.673276	0.777586			4.19138	4.54224			73.638	92.8497			14.5833	14.5833			0.806034	0.881897			1.33672	1.09631
513.259	539.205			54.6745	52.7897			0.768103	0.787069			4.1819	4.37155			62.0541	77.202			11.9444	18.3333			0.891379	0.758621			0.964581	1.29914
559.441	490.196			51.6944	48.4361			0.777586	0.68908			4.30517	4.76983			58.3753	97.1958			13.3333	22.5				0.976724			1.09748	1.34979
537.394	483.092				58.3977			0.72069	0.787069			3.92586	4.16293			66.5042	67.5286			13.75	17.9167			0.72069	0.825			1.10281	1.06442
512.821	506.116			64.809	52.8584			0.749138	0.758621			3.89741	3.98276			69.0767	77.1922			11.6667	18.3333			0.900862	0.843966			0.968297	1.27964
525.97	514.029			61.4109	51.1073			0.749138	0.796552			3.99224	4.3431			81.0763	78.5491			11.6667	17.5			0.834483	0.682759				1.00474
502.864	534.762			57.3041	54.815			0.72069	0.796552			3.97328	4.1819			80.4731	68.7546			13.75	14.5833			0.777586	0.777586
582.545	528.867			54.8886	63.7165								4.55172				81.8366				15			0.834483	0.967241
	531.561			58.459	50.0147																15.8333
Statistics				Statistics				Statistics				Statistics				Statistics				Statistics				Statistics				Statistics
Table Analyzed	Heart rate			Table Analyzed	LVEF (%)			Table Analyzed	LVPWd (mm)			Table Analyzed	LVIDd (mm)			Table Analyzed	LVEDV (µL)			Table Analyzed	IVRT, ms			Table Analyzed	IVSd (mm)			Table Analyzed	MV E/A
Column B	Efnb1 cKO			Column B	Efnb1 cKO			Column B	Efnb1 cKO			Column B	Efnb1 cKO			Column B	Efnb1 cKO			Column B	Efnb1 cKO			Column B	Efnb1 cKO			Column B	Efnb1ciKo
vs.	vs,			vs.	vs,			vs.	vs,			vs.	vs,			vs.	vs,			vs.	vs,			vs.	vs,			vs.	vs,
Column A	Ctrl			Column A	Ctrl			Column A	Ctrl			Column A	Ctrl			Column A	Ctrl			Column A	Ctrl			Column A	Ctrl			Column A	Efnb1f/f
Unpaired t test				Unpaired t test				Unpaired t test				Unpaired t test				Unpaired t test				Unpaired t test				Unpaired t test				Unpaired t test
P value	0.1913			P value	0.168			P value	0.1149			P value	0.0194			P value	0.0683			P value	0.0012			P value	0.5803			P value	0.4868
P value summary	ns			P value summary	ns			P value summary	ns			P value summary	*			P value summary	ns			P value summary	**			P value summary	ns			P value summary	ns
Significantly different (P < 0.05)?	No			Significantly different (P < 0.05)?	No			Significantly different (P < 0.05)?	No			Significantly different (P < 0.05)?	Yes			Significantly different (P < 0.05)?	No			Significantly different (P < 0.05)?	Yes			Significantly different (P < 0.05)?	No			Significantly different (P < 0.05)?	No
One- or two-tailed P value?	Two-tailed			One- or two-tailed P value?	Two-tailed			One- or two-tailed P value?	Two-tailed			One- or two-tailed P value?	Two-tailed			One- or two-tailed P value?	Two-tailed			One- or two-tailed P value?	Two-tailed			One- or two-tailed P value?	Two-tailed			One- or two-tailed P value?	Two-tailed
t, df	t=1,368, df=15			t, df	t=1,449, df=15			t, df	t=1,700, df=12			t, df	t=2,668, df=13			t, df	t=1,988, df=13			t, df	t=4,043, df=14			t, df	t=0,5652, df=15			t, df	t=0,7220, df=10
How big is the difference?				How big is the difference?				How big is the difference?				How big is the difference?				How big is the difference?				How big is the difference?				How big is the difference?				How big is the difference?
Mean of column A	536.4			Mean of column A	56.94			Mean of column A	0.7369			Mean of column A	4.067			Mean of column A	70.17			Mean of column A	12.96			Mean of column A	0.8072			Mean of column A	1.094
Mean of column B	519.6			Mean of column B	53.66			Mean of column B	0.7704			Mean of column B	4.363			Mean of column B	80.14			Mean of column B	17.18			Mean of column B	0.8313			Mean of column B	1.157
Difference between means (B - A) ± SEM	-16,76 ± 12,25			Difference between means (B - A) ± SEM	-3,274 ± 2,260			Difference between means (B - A) ± SEM	0,03342 ± 0,01966			Difference between means (B - A) ± SEM	0,2965 ± 0,1111			Difference between means (B - A) ± SEM	9,967 ± 5,015			Difference between means (B - A) ± SEM	4,220 ± 1,044			Difference between means (B - A) ± SEM	0,02410 ± 0,04265			Difference between means (B - A) ± SEM	0,06306 ± 0,08733
95% confidence interval	-42,86 to 9,345			95% confidence interval	-8,092 to 1,543			95% confidence interval	-0,009414 to 0,07624			95% confidence interval	0,05638 to 0,5366			95% confidence interval	-0,8666 to 20,80			95% confidence interval	1,981 to 6,458			95% confidence interval	-0,06680 to 0,1150			95% confidence interval	-0,1315 to 0,2576
R squared (eta squared)	0.111			R squared (eta squared)	0.1228			R squared (eta squared)	0.1941			R squared (eta squared)	0.3538			R squared (eta squared)	0.2331			R squared (eta squared)	0.5386			R squared (eta squared)	0.02085			R squared (eta squared)	0.04955
F test to compare variances				F test to compare variances				F test to compare variances				F test to compare variances				F test to compare variances				F test to compare variances				F test to compare variances				F test to compare variances
F, DFn, Dfd	1,501, 7, 8			F, DFn, Dfd	1,109, 8, 7			F, DFn, Dfd	1,163, 6, 6			F, DFn, Dfd	2,605, 7, 6			F, DFn, Dfd	1,433, 7, 6			F, DFn, Dfd	4,613, 8, 6			F, DFn, Dfd	1,722, 8, 7			F, DFn, Dfd	1,049, 4, 6
P value	0.5797			P value	0.9044			P value	0.859			P value	0.264			P value	0.6768			P value	0.0787			P value	0.488			P value	0.9107
P value summary	ns			P value summary	ns			P value summary	ns			P value summary	ns			P value summary	ns			P value summary	ns			P value summary	ns			P value summary	ns
Significantly different (P < 0.05)?	No			Significantly different (P < 0.05)?	No			Significantly different (P < 0.05)?	No			Significantly different (P < 0.05)?	No			Significantly different (P < 0.05)?	No			Significantly different (P < 0.05)?	No			Significantly different (P < 0.05)?	No			Significantly different (P < 0.05)?	No
Data analyzed				Data analyzed				Data analyzed				Data analyzed				Data analyzed				Data analyzed				Data analyzed				Data analyzed
Sample size, column A	8			Sample size, column A	8			Sample size, column A	7			Sample size, column A	7			Sample size, column A	7			Sample size, column A	7			Sample size, column A	8			Sample size, column A	5
Sample size, column B	9			Sample size, column B	9			Sample size, column B	7			Sample size, column B	8			Sample size, column B	8			Sample size, column B	9			Sample size, column B	9			Sample size, column B	7
