# Supplementary material for: Ephrin-B1 regulates the adult diastolic function through a late postnatal maturation of cardiomyocyte surface crests
Source: eLife. 2023 Jan 17;12:e80904. doi: 10.7554/eLife.80904 (PMC9844986; doi:10.7554/eLife.80904)
Supplement: Figure 7—source data 3. [file elife-80904-fig7-data3.xlsx]

## Sheet: Feuil1
Figure 7D
Heart rate (bpm)				EDP (mmHg)				Min dP/dt (mmHg/s)					Tau (ms)
Ctrl	Efnb1 cKO			Ctrl	Efnb1 cKO			Ctrl	Efnb1 cKO			Ctrl	Efnb1 cKO
332.015	362.978			4.00987	6.07459			-3972.09	-4788.6			0.0196815	0.0176829
363.505	399.906			4.7905	7.85687			-4543.24	-3297.82			0.0167324	0.0305096
416.45	412.406			3.61154	6.58569			-4105.78	-4217.03			0.0197055	0.0177948
423.117	406.901			4.9065	4.73916			-3853.42	-4303.87			0.0168587	0.0205347
406.603	357.917			5.41177	7.34434			-4392.58	-4738.93			0.0164474	0.0184158
387.696	441.162			5.254	7.44875			-4163.62	-3585.17			0.0146165	0.0177829
	413.06				6.28054				-4533.6			0.0164474	0.0158239
	416.082				6.01638				-5224.06				0.0181627
	376.672				7.79326				-5003.43
Statistics				Statistics				Statistics				Statistics
Table Analyzed	Heart rate (bpm)			Table Analyzed	EDP (mmHg)			Table Analyzed	Min dP/dt (mmHg/s)			Table Analyzed	Tau (ms)
Column B	Efnb1 cKO			Column B	Efnb1 cKO			Column B	Efnb1 cKO			Column B	Efnb1 cKO
vs.	vs,			vs.	vs,			vs.	vs,			vs.	vs,
Column A	Ctrl			Column A	Ctrl			Column A	Ctrl			Column A	Ctrl
Unpaired t test				Unpaired t test				Unpaired t test				Unpaired t test
P value	0.5319			P value	0.0011			P value	0.4041			P value	0.2874
P value summary	ns			P value summary	**			P value summary	ns			P value summary	ns
Significantly different (P < 0.05)?	No			Significantly different (P < 0.05)?	Yes			Significantly different (P < 0.05)?	No			Significantly different (P < 0.05)?	No
One- or two-tailed P value?	Two-tailed			One- or two-tailed P value?	Two-tailed			One- or two-tailed P value?	Two-tailed			One- or two-tailed P value?	Two-tailed
t, df	t=0,6423, df=13			t, df	t=4,179, df=13			t, df	t=0,8623, df=13			t, df	t=1,113, df=12
How big is the difference?				How big is the difference?				How big is the difference?				How big is the difference?
Mean of column A	388.2			Mean of column A	4.664			Mean of column A	-4172			Mean of column A	0.01734
Mean of column B	398.6			Mean of column B	6.682			Mean of column B	-4410			Mean of column B	0.01959
Difference between means (B - A) ± SEM	10,33 ± 16,09			Difference between means (B - A) ± SEM	2,018 ± 0,4830			Difference between means (B - A) ± SEM	-238,5 ± 276,6			Difference between means (B - A) ± SEM	0,002248 ± 0,002019
95% confidence interval	-24,43 to 45,09			95% confidence interval	0,9748 to 3,062			95% confidence interval	-836,0 to 359,0			95% confidence interval	-0,002151 to 0,006648
R squared (eta squared)	0.03076			R squared (eta squared)	0.5732			R squared (eta squared)	0.0541			R squared (eta squared)	0.09362
F test to compare variances				F test to compare variances				F test to compare variances				F test to compare variances
F, DFn, Dfd	1,635, 5, 8			F, DFn, Dfd	2,085, 8, 5			F, DFn, Dfd	6,106, 8, 5			F, DFn, Dfd	5,309, 7, 5
P value	0.5107			P value	0.4343			P value	0.0618			P value	0.0845
P value summary	ns			P value summary	ns			P value summary	ns			P value summary	ns
Significantly different (P < 0.05)?	No			Significantly different (P < 0.05)?	No			Significantly different (P < 0.05)?	No			Significantly different (P < 0.05)?	No
Data analyzed				Data analyzed				Data analyzed				Data analyzed
Sample size, column A	6			Sample size, column A	6			Sample size, column A	6			Sample size, column A	6
Sample size, column B	9			Sample size, column B	9			Sample size, column B	9			Sample size, column B	8
