# Supplementary material for: Ephrin-B1 regulates the adult diastolic function through a late postnatal maturation of cardiomyocyte surface crests
Source: eLife. 2023 Jan 17;12:e80904. doi: 10.7554/eLife.80904 (PMC9844986; doi:10.7554/eLife.80904)
Supplement: Figure 8—source data 1. [file elife-80904-fig8-data1.xlsx]

## Sheet: Feuil1
Figure 8A
LVEF (%)												LVIDd (mm)																					LVEDV (µL)
	WT			KO
	Mean	SD	N	Mean	SD	N							WT									KO												WT									KO
2 months	57.05	3.318	9	56.61	1.726	8						2 months	4.39138	3.94203	4.11552	4.27989	3.96724	3.95043	3.97565	4.12263	4.22931	4.29569	4.24828	4.00172		4.32414	4.39052	4.14741	4.28621				2 months	74.5091	72.9688	74.6047	83.9916	61.1158	63.5247	75.4694	82.0517	70.0288	77.3316	67.9069	72.3203	60.0377	78.0922	80.6143	80.4301
4 months	63.63	7.234	4	57.81	6.819	4						4 months	3.85	3.93684	3.53158	3.96579						4.28421	4.28421	3.67632	3.8921								4 months	69.1424	58.041	55.9085	65.0829						82.3494	79.5133	68.9555	55.6744
9 months	65.08	5.067	9	43.75	6.4	8						9 months	4.02069	3.91121	3.82586	4.24828	4.36207	4.70345	3.68879	4.14397	4.19138	4.81724	4.21035	4.77328	3.97328	4.26724	4.3431	4.6181	4.05862				9 months	68.0363	49.1783	40.9729	78.7245	68.8902	69.2766	66.272	81.8925	70.665	91.0467	75.7095	106.128	57.3461	56.7562	62.1656	79.1965
12 months	58.64	2.984	9	35.62	6.19	8						12 months	4.26724	4.58017	4.37155	4.59598	4.4569	4.75086	4.24828	4.66552		5.96659	4.675	5.27241	4.71293	5.10172	4.85517	5.38621	5.14914				12 months	95.5132	89.8975	80.6216	101.978	94.9133	92.9285				211.632	106.767	122.25	120.753	108.504	131.653	138.341
>13 months	56.13	5.433	9	15.76	1.868	5						>13 months	4.21035	4.39368	4.75086	4.3431	4.3431	4.21035	4.28621	4.14397	4.17241	5.53125	5.36465	5.41746	5.00991	5.4	4.7944						>13 months	59.295	73.3388	105.001	66.5493	71.0099	63.8449	84.4893	72.9913	69.34	131.888	178.222	151.749	118.783	137.157	178.913
Statistics												Statistics																					Statistics
Multiple Unpaired t test between WT and cKO												Multiple Unpaired t test between WT and cKO																					Multiple Unpaired t test between WT and cKO
	Discovery?	P value	Mean of WT	Mean of cKO	Difference	SE of difference	t ratio	df	q value				Discovery?	P value	Mean of WT	Mean of cKO	Difference	SE of difference	t ratio	df	q value													Discovery?	P value	Mean of WT	Mean of cKO	Difference	SE of difference	t ratio	df	q value
2 months	No	0.741505	57.05	56.61	0.44	1.309	0.336	15	0.299568			2 months	No	0.09852	4.108	4.242	-0.1338	0.07558	1.77	14	0.080227												2 months	No	0.726243	73.14	74.42	-1.283	3.596	0.3568	15	0.586804
4 months	No	0.286042	63.63	57.81	5.82	4.971	1.171	6	0.144451			4 months	No	0.283043	3.821	4.034	-0.2132	0.1808	1.179	6	0.171524												4 months	No	0.207563	62.04	71.62	-9.579	6.783	1.412	6	0.209639
9 months	Yes	1e-06	65.08	43.75	21.33	2.783	7.664	15	<0,000001			9 months	No	0.10591	4.122	4.383	-0.2609	0.1517	1.72	15	0.080227												9 months	No	0.159888	65.99	77.06	-11.07	7.487	1.479	15	0.209639
12 months	Yes	<0,000001	58.64	35.62	23.02	2.312	9.959	15	<0,000001			12 months	Yes	0.00137	4.492	5.14	-0.6478	0.1628	3.98	14	0.002075												12 months	No	0.018124	92.64	134.3	-41.63	15.01	2.773	11	0.036611
>13 months	Yes	<0,000001	56.13	15.76	40.37	2.546	15.85	12	<0,000001			>13 months	Yes	3e-06	4.317	5.253	-0.9358	0.1204	7.775	13	9e-06												>13 months	Yes	4e-06	73.98	149.5	-75.47	9.892	7.629	13	1.5e-05
																																	Tukey's multiple comparisons test	Predicted (LS) mean diff,	95,00% CI of diff,	Below threshold?	Summary	Adjusted P Value
Tukey's multiple comparisons test	Predicted (LS) mean diff,	95,00% CI of diff,	Below threshold?	Summary	Adjusted P Value							Tukey's multiple comparisons test	Predicted (LS) mean diff,	95,00% CI of diff,	Below threshold?	Summary	Adjusted P Value
																																	WT
WT												WT																					2 months vs. 4 months	11.1	-17,79 to 39,98	No	ns	0.8158
2 months vs. 4 months	-6.58	-14,78 to 1,619	No	ns	0.1739							2 months vs. 4 months	0.2872	-0,1590 to 0,7334	No	ns	0.3782																2 months vs. 9 months	7.151	-15,51 to 29,81	No	ns	0.9004
2 months vs. 9 months	-8.03	-14,46 to -1,598	Yes	**	0.0073							2 months vs. 9 months	-0.01351	-0,3635 to 0,3365	No	ns	>0,9999																2 months vs. 12 months	-19.5	-44,83 to 5,830	No	ns	0.2071
2 months vs. 12 months	-1.59	-8,022 to 4,842	No	ns	0.957							2 months vs. 12 months	-0.3838	-0,7446 to -0,02302	Yes	*	0.0316																2 months vs. >13 months	-0.8439	-23,50 to 21,81	No	ns	>0,9999
2 months vs. >13 months	0.92	-5,512 to 7,352	No	ns	0.9944							2 months vs. >13 months	-0.2089	-0,5589 to 0,1412	No	ns	0.4556																4 months vs. 9 months	-3.946	-32,83 to 24,94	No	ns	0.9953
4 months vs. 9 months	-1.45	-9,649 to 6,749	No	ns	0.9874							4 months vs. 9 months	-0.3007	-0,7469 to 0,1455	No	ns	0.3317																4 months vs. 12 months	-30.6	-61,62 to 0,4261	No	ns	0.055
4 months vs. 12 months	4.99	-3,209 to 13,19	No	ns	0.4359							4 months vs. 12 months	-0.671	-1,126 to -0,2163	Yes	***	0.001																4 months vs. >13 months	-11.94	-40,82 to 16,94	No	ns	0.7723
4 months vs. >13 months	7.5	-0,6991 to 15,70	No	ns	0.0887							4 months vs. >13 months	-0.4961	-0,9423 to -0,04985	Yes	*	0.022																9 months vs. 12 months	-26.65	-51,98 to -1,321	Yes	*	0.0344
9 months vs. 12 months	6.44	0,008073 to 12,87	Yes	*	0.0496							9 months vs. 12 months	-0.3703	-0,7311 to -0,009511	Yes	*	0.0415																9 months vs. >13 months	-7.995	-30,65 to 14,66	No	ns	0.8577
9 months vs. >13 months	8.95	2,518 to 15,38	Yes	**	0.0021							9 months vs. >13 months	-0.1954	-0,5454 to 0,1547	No	ns	0.5231																12 months vs. >13 months	18.66	-6,674 to 43,99	No	ns	0.2459
12 months vs. >13 months	2.51	-3,922 to 8,942	No	ns	0.808							12 months vs. >13 months	0.1749	-0,1859 to 0,5358	No	ns	0.6537
																																	KO
KO												KO																					2 months vs. 4 months	2.8	-26,63 to 32,23	No	ns	0.9988
2 months vs. 4 months	-1.2	-9,555 to 7,155	No	ns	0.9943							2 months vs. 4 months	0.2078	-0,2576 to 0,6732	No	ns	0.7196																2 months vs. 9 months	-2.639	-26,67 to 21,39	No	ns	0.998
2 months vs. 9 months	12.86	6,038 to 19,68	Yes	****	<0,0001							2 months vs. 9 months	-0.1407	-0,5250 to 0,2436	No	ns	0.8413																2 months vs. 12 months	-59.85	-84,72 to -34,97	Yes	****	<0,0001
2 months vs. 12 months	20.99	14,17 to 27,81	Yes	****	<0,0001							2 months vs. 12 months	-0.8979	-1,282 to -0,5136	Yes	****	<0,0001																2 months vs. >13 months	-75.03	-101,0 to -49,07	Yes	****	<0,0001
2 months vs. >13 months	40.85	33,07 to 48,63	Yes	****	<0,0001							2 months vs. >13 months	-1.011	-1,424 to -0,5978	Yes	****	<0,0001																4 months vs. 9 months	-5.439	-34,87 to 23,99	No	ns	0.985
4 months vs. 9 months	14.06	5,705 to 22,42	Yes	***	0.0001							4 months vs. 9 months	-0.3484	-0,8031 to 0,1063	No	ns	0.2114																4 months vs. 12 months	-62.65	-92,77 to -32,52	Yes	****	<0,0001
4 months vs. 12 months	22.19	13,83 to 30,55	Yes	****	<0,0001							4 months vs. 12 months	-1.106	-1,560 to -0,6510	Yes	****	<0,0001																4 months vs. >13 months	-77.83	-108,9 to -46,80	Yes	****	<0,0001
4 months vs. >13 months	42.05	32,90 to 51,20	Yes	****	<0,0001							4 months vs. >13 months	-1.219	-1,698 to -0,7394	Yes	****	<0,0001																9 months vs. 12 months	-57.21	-82,08 to -32,33	Yes	****	<0,0001
9 months vs. 12 months	8.13	1,308 to 14,95	Yes	*	0.0117							9 months vs. 12 months	-0.7572	-1,129 to -0,3860	Yes	****	<0,0001																9 months vs. >13 months	-72.39	-98,35 to -46,43	Yes	****	<0,0001
9 months vs. >13 months	27.99	20,21 to 35,77	Yes	****	<0,0001							9 months vs. >13 months	-0.8703	-1,271 to -0,4693	Yes	****	<0,0001																12 months vs. >13 months	-15.18	-41,92 to 11,56	No	ns	0.5054
12 months vs. >13 months	19.86	12,08 to 27,64	Yes	****	<0,0001							12 months vs. >13 months	-0.113	-0,5141 to 0,2880	No	ns	0.932
																																	Test details	Predicted (LS) mean 1	Predicted (LS) mean 2	Predicted (LS) mean diff,	SE of diff,	N1	N2	q	DF
												Test details	Predicted (LS) mean 1	Predicted (LS) mean 2	Predicted (LS) mean diff,	SE of diff,	N1	N2	q	DF
																																	WT
Test details	Predicted (LS) mean 1	Predicted (LS) mean 2	Predicted (LS) mean diff,	SE of diff,	N1	N2	q	DF				WT																					2 months vs. 4 months	73.14	62.04	11.1	10.27	9	4	1.528	60
												2 months vs. 4 months	4.108	3.821	0.2872	0.1588	9	4	2.557	62													2 months vs. 9 months	73.14	65.99	7.151	8.056	9	9	1.255	60
WT												2 months vs. 9 months	4.108	4.122	-0.01351	0.1246	9	9	0.1534	62													2 months vs. 12 months	73.14	92.64	-19.5	9.007	9	6	3.062	60
2 months vs. 4 months	57.05	63.63	-6.58	2.92	9	4	3.187	63				2 months vs. 12 months	4.108	4.492	-0.3838	0.1284	9	8	4.227	62													2 months vs. >13 months	73.14	73.98	-0.8439	8.056	9	9	0.1481	60
2 months vs. 9 months	57.05	65.08	-8.03	2.29	9	9	4.958	63				2 months vs. >13 months	4.108	4.317	-0.2089	0.1246	9	9	2.371	62													4 months vs. 9 months	62.04	65.99	-3.946	10.27	4	9	0.5434	60
2 months vs. 12 months	57.05	58.64	-1.59	2.29	9	9	0.9818	63				4 months vs. 9 months	3.821	4.122	-0.3007	0.1588	4	9	2.678	62													4 months vs. 12 months	62.04	92.64	-30.6	11.03	4	6	3.923	60
2 months vs. >13 months	57.05	56.13	0.92	2.29	9	9	0.5681	63				4 months vs. 12 months	3.821	4.492	-0.671	0.1618	4	8	5.864	62													4 months vs. >13 months	62.04	73.98	-11.94	10.27	4	9	1.644	60
4 months vs. 9 months	63.63	65.08	-1.45	2.92	4	9	0.7024	63				4 months vs. >13 months	3.821	4.317	-0.4961	0.1588	4	9	4.417	62													9 months vs. 12 months	65.99	92.64	-26.65	9.007	9	6	4.185	60
4 months vs. 12 months	63.63	58.64	4.99	2.92	4	9	2.417	63				9 months vs. 12 months	4.122	4.492	-0.3703	0.1284	9	8	4.078	62													9 months vs. >13 months	65.99	73.98	-7.995	8.056	9	9	1.403	60
4 months vs. >13 months	63.63	56.13	7.5	2.92	4	9	3.633	63				9 months vs. >13 months	4.122	4.317	-0.1954	0.1246	9	9	2.218	62													12 months vs. >13 months	92.64	73.98	18.66	9.007	6	9	2.93	60
9 months vs. 12 months	65.08	58.64	6.44	2.29	9	9	3.977	63				12 months vs. >13 months	4.492	4.317	0.1749	0.1284	8	9	1.927	62
9 months vs. >13 months	65.08	56.13	8.95	2.29	9	9	5.526	63																									KO
12 months vs. >13 months	58.64	56.13	2.51	2.29	9	9	1.55	63				KO																					2 months vs. 4 months	74.42	71.62	2.8	10.47	8	4	0.3784	60
												2 months vs. 4 months	4.242	4.034	0.2078	0.1656	7	4	1.774	62													2 months vs. 9 months	74.42	77.06	-2.639	8.545	8	8	0.4367	60
KO												2 months vs. 9 months	4.242	4.383	-0.1407	0.1368	7	8	1.454	62													2 months vs. 12 months	74.42	134.3	-59.85	8.845	8	7	9.569	60
2 months vs. 4 months	56.61	57.81	-1.2	2.975	8	4	0.5704	63				2 months vs. 12 months	4.242	5.14	-0.8979	0.1368	7	8	9.284	62													2 months vs. >13 months	74.42	149.5	-75.03	9.229	8	6	11.5	60
2 months vs. 9 months	56.61	43.75	12.86	2.429	8	8	7.487	63				2 months vs. >13 months	4.242	5.253	-1.011	0.147	7	6	9.724	62													4 months vs. 9 months	71.62	77.06	-5.439	10.47	4	8	0.735	60
2 months vs. 12 months	56.61	35.62	20.99	2.429	8	8	12.22	63				4 months vs. 9 months	4.034	4.383	-0.3484	0.1618	4	8	3.045	62													4 months vs. 12 months	71.62	134.3	-62.65	10.71	4	7	8.271	60
2 months vs. >13 months	56.61	15.76	40.85	2.77	8	5	20.86	63				4 months vs. 12 months	4.034	5.14	-1.106	0.1618	4	8	9.662	62													4 months vs. >13 months	71.62	149.5	-77.83	11.03	4	6	9.978	60
4 months vs. 9 months	57.81	43.75	14.06	2.975	4	8	6.683	63				4 months vs. >13 months	4.034	5.253	-1.219	0.1706	4	6	10.1	62													9 months vs. 12 months	77.06	134.3	-57.21	8.845	8	7	9.148	60
4 months vs. 12 months	57.81	35.62	22.19	2.975	4	8	10.55	63				9 months vs. 12 months	4.383	5.14	-0.7572	0.1321	8	8	8.104	62													9 months vs. >13 months	77.06	149.5	-72.39	9.229	8	6	11.09	60
4 months vs. >13 months	57.81	15.76	42.05	3.259	4	5	18.25	63				9 months vs. >13 months	4.383	5.253	-0.8703	0.1427	8	6	8.623	62													12 months vs. >13 months	134.3	149.5	-15.18	9.508	7	6	2.258	60
9 months vs. 12 months	43.75	35.62	8.13	2.429	8	8	4.733	63				12 months vs. >13 months	5.14	5.253	-0.113	0.1427	8	6	1.12	62
9 months vs. >13 months	43.75	15.76	27.99	2.77	8	5	14.29	63
12 months vs. >13 months	35.62	15.76	19.86	2.77	8	5	10.14	63
[truncated: 19 more columns]
