# Supplementary material for: Ephrin-B1 regulates the adult diastolic function through a late postnatal maturation of cardiomyocyte surface crests
Source: eLife. 2023 Jan 17;12:e80904. doi: 10.7554/eLife.80904 (PMC9844986; doi:10.7554/eLife.80904)
Supplement: Figure 8—source data 2. [file elife-80904-fig8-data2.xlsx]

## Sheet: Feuil1
Figure 8B
Survival rate (%)					Statistics
Time (days)	KO	WT			Comparison of Survival Curves
354	1
374	1				Log-rank (Mantel-Cox) test
458	1				Chi square	41.66
389	1				df	1
484	1				P value	<0,0001
455	1				P value summary	****
484		1			Are the survival curves sig different?	Yes
460	1
473	1				Gehan-Breslow-Wilcoxon test
486		1			Chi square	36.47
473	1	0			df	1
424					P value	<0,0001
451	1				P value summary	****
417	1				Are the survival curves sig different?	Yes
374	1
522	1				Median survival
482	1				KO	476
529	1				WT	661
472		1			Ratio (and its reciprocal)	0.7201	1.389
479	1				95% CI of ratio	0,3248 to 1,597	0,6264 to 3,079
481	1
505	1				Hazard Ratio (Mantel-Haenszel)	A/B	B/A
559		1			Ratio (and its reciprocal)	13.81	0.07243
523		1			95% CI of ratio	6,221 to 30,64	0,03264 to 0,1607
504		1
458	1				Hazard Ratio (logrank)	A/B	B/A
405	1				Ratio (and its reciprocal)	8.169	0.1224
487	1				95% CI of ratio	3,810 to 17,51	0,05709 to 0,2625
541		1
500	1
551	1
661		1
552	1
507	1
600		0
600		0
600	0
600		0
600		0
600		0
600		0
600		0
600		0
600		0
600		0
600		0
600		0
600		0
600		0
600		0
600		0
600		0
600		0
600		0
600		0
600		0
