# Supplementary material for: Ephrin-B1 regulates the adult diastolic function through a late postnatal maturation of cardiomyocyte surface crests
Source: eLife. 2023 Jan 17;12:e80904. doi: 10.7554/eLife.80904 (PMC9844986; doi:10.7554/eLife.80904)
Supplement: Figure 8—source data 3. [file elife-80904-fig8-data3.xlsx]

## Sheet: Feuil1
Figure 8C
HW /TL (mg/mm)
	WT										KO
4 months	7.47368	7.89474		7.57895	7.52632	7.3	6.42105				6.94737	6.8	7.95	7.47368	8.26316	7.95
9 months	7.80851	8.15789	8.13684	7.40541	7.08947	7.84211	7.63243	7.25			8.08421	8.03158	7.77895	7.38947	7.37368	7.36842	7.36842	7.08995	7.52973
12 months	8.44737	8.63636	8.27749	9.28283	9.705	8.74747	8.82323	8.58586			9.405	10.2923	10.2205	8.84324	9.9	10.8632	11.8526	10.3125
Statistics
Multiple Unpaired t test between WT and cKO
	Discovery?	P value	Mean of WT	Mean of cKO	Difference	SE of difference	t ratio	df	q value
4 months	No	0.54597	7.366	7.564	-0.1982	0.3172	0.625	10	0.370712
9 months	No	0.550562	7.665	7.557	0.1082	0.1771	0.6107	15	0.370712
12 months	Yes	0.001674	8.813	10.21	-1.398	0.3605	3.878	14	0.003381
Tukey's multiple comparisons test	Predicted (LS) mean diff,	95,00% CI of diff,	Below threshold?	Summary	Adjusted P Value
WT
4 months vs. 9 months	-0.2995	-1,038 to 0,4391	No	ns	0.5887
4 months vs. 12 months	-1.447	-2,186 to -0,7088	Yes	****	<0,0001
9 months vs. 12 months	-1.148	-1,832 to -0,4640	Yes	***	0.0006
KO
4 months vs. 9 months	0.006878	-0,7139 to 0,7277	No	ns	0.9997
4 months vs. 12 months	-2.647	-3,386 to -1,909	Yes	****	<0,0001
9 months vs. 12 months	-2.654	-3,319 to -1,989	Yes	****	<0,0001
Test details	Predicted (LS) mean 1	Predicted (LS) mean 2	Predicted (LS) mean diff,	SE of diff,	N1	N2	q	DF
WT
4 months vs. 9 months	7.366	7.665	-0.2995	0.3032	6	8	1.397	39
4 months vs. 12 months	7.366	8.813	-1.447	0.3032	6	8	6.752	39
9 months vs. 12 months	7.665	8.813	-1.148	0.2807	8	8	5.783	39
KO
4 months vs. 9 months	7.564	7.557	0.006878	0.2959	6	9	0.03288	39
4 months vs. 12 months	7.564	10.21	-2.647	0.3032	6	8	12.35	39
9 months vs. 12 months	7.557	10.21	-2.654	0.2728	9	8	13.76	39
