# Supplementary material for: Ephrin-B1 regulates the adult diastolic function through a late postnatal maturation of cardiomyocyte surface crests
Source: eLife. 2023 Jan 17;12:e80904. doi: 10.7554/eLife.80904 (PMC9844986; doi:10.7554/eLife.80904)
Supplement: Figure 8—source data 4. [file elife-80904-fig8-data4.xlsx]

## Sheet: Feuil1
Figure 8D
CSA (µm2)
	WT										KO
2 months	358.7	344.6	358.5	300.1	307.5						247.3	227.8	241.7	257.6	246.9	225.2
9 months	431.5	321.4	380.6	424.5	413.6	413.8	378.7	319.2	423.8		416.6	582.7	481.4	397.4	568.1	559.5	520.6	478.4	469.7
12 months	397.5	378.9	331.2	420.6	355.4	358.4	439.2	404.4			583.5	494.6	453.9	503.8	463.3	559.1	690.3	808.6
Statistics
Multiple Unpaired t test between WT and cKO
	Discovery?	P value	Mean of WT	Mean of cKO	Difference	SE of difference	t ratio	df	q value
2 months	Yes	4.5e-05	333.9	241.1	92.8	12.68	7.316	9	0.000136
9 months	Yes	0.000852	389.7	497.2	-107.5	26.27	4.091	16	0.001221
12 months	Yes	0.001209	385.7	569.6	-183.9	45.49	4.043	14	0.001221
Tukey's multiple comparisons test	Predicted (LS) mean diff,	95,00% CI of diff,	Below threshold?	Summary	Adjusted P Value
WT
2 months vs. 9 months	-55.8	-145,4 to 33,80	No	ns	0.294
2 months vs. 12 months	-51.82	-143,4 to 39,75	No	ns	0.3617
9 months vs. 12 months	3.978	-74,07 to 82,03	No	ns	0.9915
KO
2 months vs. 9 months	-256.1	-340,7 to -171,4	Yes	****	<0,0001
2 months vs. 12 months	-328.6	-415,3 to -241,8	Yes	****	<0,0001
9 months vs. 12 months	-72.48	-150,5 to 5,568	No	ns	0.0733
Test details	Predicted (LS) mean 1	Predicted (LS) mean 2	Predicted (LS) mean diff,	SE of diff,	N1	N2	q	DF
WT
2 months vs. 9 months	333.9	389.7	-55.8	36.77	5	9	2.146	39
2 months vs. 12 months	333.9	385.7	-51.82	37.59	5	8	1.95	39
9 months vs. 12 months	389.7	385.7	3.978	32.04	9	8	0.1756	39
KO
2 months vs. 9 months	241.1	497.2	-256.1	34.75	6	9	10.42	39
2 months vs. 12 months	241.1	569.6	-328.6	35.61	6	8	13.05	39
9 months vs. 12 months	497.2	569.6	-72.48	32.04	9	8	3.2	39
