# Supplementary material for: Ephrin-B1 regulates the adult diastolic function through a late postnatal maturation of cardiomyocyte surface crests
Source: eLife. 2023 Jan 17;12:e80904. doi: 10.7554/eLife.80904 (PMC9844986; doi:10.7554/eLife.80904)
Supplement: Figure 8—source data 5. [file elife-80904-fig8-data5.xlsx]

## Sheet: Feuil1
Figure 8E
Fibrosis (%)
	WT											KO
2 months	0.21	0.42	0.33	1.57	0.5	0.74						1.71	1.12	1.39	1.4	0.66	1.17
9 months	0.24	0.95	1.78	1	0.71	0.55	0.55	0.62				1.17	1.21	1	2.17	1.15	1.58	1.65	1.76	0.47
12 months	0.26	0.29	0.3	0.72	0.91	0.7	0.64	0.51	1.18	0.84		10.93	3.45	2.85	3.43	3.78	4.74	7.21	5.86	9.56
Statistics
Multiple Unpaired t test between WT and cKO
	Discovery?	P value	Mean of WT	Mean of cKO	Difference	SE of difference	t ratio	df	q value
2 months	No	0.033029	0.6283	1.242	-0.6133	0.2482	2.471	10	0.022239
9 months	No	0.032456	0.8	1.351	-0.5511	0.2339	2.357	15	0.022239
12 months	Yes	3.4e-05	0.635	5.757	-5.122	0.9209	5.562	17	7e-05
Tukey's multiple comparisons test	Predicted (LS) mean diff,	95,00% CI of diff,	Below threshold?	Summary	Adjusted P Value
WT
2 months vs. 9 months	-0.1717	-1,909 to 1,565	No	ns	0.9687
2 months vs. 12 months	-0.006667	-1,668 to 1,654	No	ns	>0,9999
9 months vs. 12 months	0.165	-1,361 to 1,691	No	ns	0.9627
KO
2 months vs. 9 months	-0.1094	-1,805 to 1,586	No	ns	0.9865
2 months vs. 12 months	-4.515	-6,210 to -2,820	Yes	****	<0,0001
9 months vs. 12 months	-4.406	-5,922 to -2,889	Yes	****	<0,0001
Test details	Predicted (LS) mean 1	Predicted (LS) mean 2	Predicted (LS) mean diff,	SE of diff,	N1	N2	q	DF
WT
2 months vs. 9 months	0.6283	0.8	-0.1717	0.715	6	8	0.3396	42
2 months vs. 12 months	0.6283	0.635	-0.006667	0.6836	6	10	0.01379	42
9 months vs. 12 months	0.8	0.635	0.165	0.628	8	10	0.3716	42
KO
2 months vs. 9 months	1.242	1.351	-0.1094	0.6977	6	9	0.2218	42
2 months vs. 12 months	1.242	5.757	-4.515	0.6977	6	9	9.151	42
9 months vs. 12 months	1.351	5.757	-4.406	0.6241	9	9	9.983	42
